# Supplementary material
Source: publisher figshare collection journal article supplement (https://acs.figshare.com/ndownloader/files/4150480)

**Sequential Protocol for C(sp<sup>3</sup>)-H Carboxylation with CO<sub>2</sub>:  
Transition Metal-Catalyzed Benzylic C-H Silylation and  
Fluoride-Mediated Carboxylation**

Tsuyoshi Mita,\* Kenichi Michigami, and Yoshihiro Sato\*

*Faculty of Pharmaceutical Sciences, Hokkaido University, Sapporo  
060-0812, Japan*

tmita@pharm.hokudai.ac.jp

biyo@pharm.hokudai.ac.jp

**Supporting Information**

## Table of Contents

|     |                                                 |     |
|-----|-------------------------------------------------|-----|
| (A) | General                                         | S3  |
| (B) | Synthesis of Substrates                         | S3  |
| (C) | C-H Silylation Reactions                        | S3  |
| (D) | Carboxylation Reactions                         | S4  |
| (E) | Sequential Reactions (Silylation-Carboxylation) | S5  |
| (F) | Derivatization of the Product                   | S11 |
| (G) | $^1\text{H}$ and $^{13}\text{C}$ NMR Spectra    | S13 |

## (A) General

Infrared (IR) spectra were recorded on a JASCO FT/IR 460 Plus Fourier transform infrared spectrophotometer. NMR spectra were recorded on a JEOL ECA-500 spectrometer, operating at 500 MHz ( $^1\text{H}$ ) or 125 MHz ( $^{13}\text{C}$ ). Chemical shifts in  $\text{CDCl}_3$  were reported in the scale relative to  $\text{CHCl}_3$  (7.26 ppm) for  $^1\text{H}$  NMR and to  $\text{CDCl}_3$  (77.0 ppm) for  $^{13}\text{C}$  NMR as internal references. EI mass spectra were measured on a JEOL JMS-T100GCv. Column chromatography was performed with silica gel Kanto 60 (230-400 mesh ASTM). Dry toluene and DMF were purified under argon using the Ultimate Solvent System (Glass Counter Inc.).  $[\text{Ir}(\text{cod})\text{Cl}]_2$ ,  $\text{Ru}_3(\text{CO})_{12}$ , and  $\text{Et}_3\text{SiH}$  were purchased from Aldrich, Inc. Norbornene and  $\text{CsF}$  were purchased from Tokyo Kasei, Co. Ltd. and Nacalai Tesque, Inc., respectively. All of these materials were used as received. A cylinder of  $\text{CO}_2$  was purchased from Hokkaido Air Water, Inc.

## (B) Synthesis of Substrates

8-Methylquinoline (**1b**) and 5-methylquinoxaline (**1f**) were purchased from Aldrich, Inc. and Tokyo Kasei, Co. Ltd., respectively. 4,8-Dimethylquinoline (**1d**), 5,8-dimethylquinoline (**1e**), and 2,4-dimethylbenzoxazol (**1l**) were synthesized by reported methods.<sup>1,2,3</sup> The other materials (**1c**,<sup>4</sup> **1g**,<sup>5</sup> **1h**,<sup>4</sup> **1i**,<sup>6</sup> **1j**,<sup>7</sup> and **1k**) were prepared by Suzuki-Miyaura cross-coupling reactions of *N*-heteroaryl bromides with aryl boronic acids.<sup>8</sup>

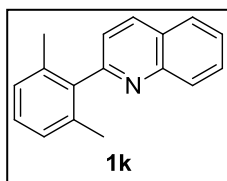

**2-(2,6-Dimethylphenyl)quinoline (1k):** Colorless solid. mp. 79.4-80.8 °C; IR (neat): 3057, 2921, 1599, 1501, 1463, 1423, 1304, 1121, 1045, 834, 760  $\text{cm}^{-1}$ ;  $^1\text{H}$  NMR (500 MHz,  $\text{CDCl}_3$ )  $\delta$  = 8.24 (d,  $J$  = 8.0 Hz, 1H), 8.17 (d,  $J$  = 8.1 Hz, 1H), 7.89 (d,  $J$  = 8.1 Hz, 1H), 7.75 (dd,  $J$  = 8.1, 7.3 Hz, 1H), 7.59 (dd,  $J$  = 8.1, 7.3 Hz, 1H), 7.37 (d,  $J$  = 8.0 Hz, 1H), 7.23 (t,  $J$  = 7.4 Hz, 1H), 7.14 (d,  $J$  = 7.4 Hz, 2H), 2.08 (s, 6H) ppm;  $^{13}\text{C}$  NMR (125 MHz,  $\text{CDCl}_3$ )  $\delta$  = 160.5, 148.1, 140.6, 136.3, 135.7, 129.5, 129.5, 128.0, 127.7, 127.6, 126.7, 126.4, 122.6, 20.2 ppm; HRMS (EI):  $m/z$  calcd for  $\text{C}_{17}\text{H}_{14}\text{N}^+$  [ $\text{M}^+$ ]: 232.1126, Found: 232.1124.

## (C) C-H Silylation Reactions

### (C-1) General Procedure - Method A

To a 10 mL test tube combined with condenser was placed a substrate **1** (0.4 mmol, 1.0 equiv), then evacuated and backfilled with argon (x3). To the reaction tube was added 0.20 mL of toluene (2.0 M),  $[\text{Ir}(\text{cod})\text{Cl}]_2$  (13.4 mg, 20  $\mu\text{mol}$ , 5 mol %), and  $\text{Et}_3\text{SiH}$  (**method A1**: 232.6 mg, 320  $\mu\text{L}$ , 2.0 mmol, 5.0 equiv; **method A2**: 325.6 mg, 450  $\mu\text{L}$ , 2.8 mmol, 7.0 equiv). The resulting mixture was stirred under

<sup>1</sup> O'Murchu, C. *Synthesis* **1989**, 880.

<sup>2</sup> Ranu, B. C.; Hajra, A.; Dey, S. S.; Jana, U. *Tetrahedron* **2003**, 59, 813.

<sup>3</sup> Lee, J. J.; Kim, J.; Jun, Y. M.; Lee, B. M.; Kim, B. H. *Tetrahedron* **2009**, 65, 8821.

<sup>4</sup> Kakiuchi, F.; Tsuchiya, K.; Matsumoto, M.; Mizushima, E.; Chatani, N. *J. Am. Chem. Soc.* **2004**, 126, 12792.

<sup>5</sup> Böhm, V. P. W.; Weskamp, T.; Gstöttmayr, C. W. K.; Herrmann, W. A. *Angew. Chem., Int. Ed.* **2000**, 39, 1602.

<sup>6</sup> Ackermann, L.; Potukuchi, H. K.; Kapdi, A. R.; Schulzke, C. *Chem. Eur. J.* **2010**, 16, 3300.

<sup>7</sup> Zheng, X.; Song, B.; Xu, B. *Eur. J. Org. Chem.* **2010**, 4376.

<sup>8</sup> Petitjean, A.; Khoury, R. G.; Kyritsakas, N.; Lehn, J.-M. *J. Am. Chem. Soc.* **2004**, 126, 6637.

reflux for 20 h. After monitoring the progress of the reaction by a TLC, the reaction mixture was passed through a short pad of silica-gel. The solvent was removed and dried under reduced pressure. The yields of the corresponding products were determined by  $^1\text{H}$  NMR analysis using 1,1,2,2-tetrachloroethane as an internal standard, then purified by flash silica-gel column chromatography.

### (C-2) General Procedure - Method B

To a 10 mL sealed tube was placed a substrate **1** (0.3 mmol, 1.0 equiv), then evacuated and backfilled with argon (x3). To the reaction tube was added  $\text{Ru}_3(\text{CO})_{12}$  (11.5 mg, 18  $\mu\text{mol}$ , 6 mol %), norbornene (**method B1**: 141.2 mg, 1.5 mmol, 5.0 equiv; **method B2**: 197.7 mg, 2.1 mmol, 7.0 equiv), 0.15 mL of toluene (2.0 M), and  $\text{Et}_3\text{SiH}$  (**method B1**: 174.4 mg, 240  $\mu\text{L}$ , 1.5 mmol, 5.0 equiv; **method B2**: 244.2 mg, 335  $\mu\text{L}$ , 2.1 mmol, 7.0 equiv). The system was closed and stirred at 150  $^\circ\text{C}$  for 20 h. After monitoring the progress of the reaction by a TLC, the reaction mixture was passed through a short pad of silica-gel. The solvent was removed and dried under reduced pressure. The yields of the corresponding products were determined by  $^1\text{H}$  NMR analysis using 1,1,2,2-tetrachloroethane as an internal standard, then purified by flash silica-gel column chromatography.

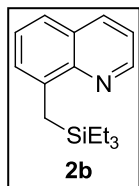

**8-Triethylsilylmethylquinoline (2b)**<sup>4</sup>: 8-Methylquinoline (57.3 mg, 0.4 mmol) was used as a substrate. By using the **method A1** ( $[\text{Ir}(\text{cod})\text{Cl}]_2$ : 13.4 mg, 20  $\mu\text{mol}$ , 5 mol %;  $\text{Et}_3\text{SiH}$ : 232.6 mg, 2.0 mmol, 5.0 equiv; toluene: 0.2 mL, reflux for 20 h) and **method B1** ( $\text{Ru}_3(\text{CO})_{12}$ : 11.5 mg, 18  $\mu\text{mol}$ , 6 mol %;  $\text{Et}_3\text{SiH}$ : 232.6 mg, 2.0 mmol, 5.0 equiv; norbornene: 141.2 mg, 1.5 mmol, 5.0 equiv; toluene: 0.2 mL, 150  $^\circ\text{C}$  in closed sealed tube for 20 h), **2b** was obtained in 98% (0.39 mmol) and 93% yields (0.37 mmol), respectively. **2b** was purified by flash silica-gel column chromatography (hexane/ethyl acetate, 40:1).

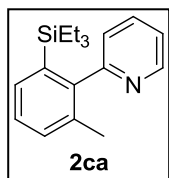

**2-(2-Methyl-6-triethylsilylphenyl)pyridine (2ca)**<sup>4</sup>: 2-(*o*-Tolyl)pyridine (67.7 mg, 0.4 mmol) was used as a substrate. By using the **method A2** ( $[\text{Ir}(\text{cod})\text{Cl}]_2$ : 13.4 mg, 20  $\mu\text{mol}$ , 5 mol %;  $\text{Et}_3\text{SiH}$ : 325.6 mg, 2.8 mmol, 7.0 equiv; toluene: 0.2 mL, reflux for 20 h), **2ca** was obtained in 99% yield (0.39 mmol). **2ca** was purified by silica-gel column chromatography (hexane/ethyl acetate, 40:1).

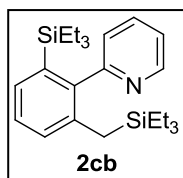

**2-(2-Triethylsilyl-6-triethylsilylmethylphenyl)pyridine (2cb)**<sup>4</sup>: 2-(*o*-Tolyl)pyridine (50.8 mg, 0.3 mmol) was used as a substrate. By using the **method B2** ( $\text{Ru}_3(\text{CO})_{12}$ : 11.5 mg, 18  $\mu\text{mol}$ , 6 mol %;  $\text{Et}_3\text{SiH}$ : 244.2 mg, 2.1 mmol, 7.0 equiv; norbornene: 197.7 mg, 2.1 mmol, 7.0 equiv; toluene: 0.2 mL, 150  $^\circ\text{C}$  in closed sealed tube for 20 h), **2cb** was obtained in quantitative yield (0.3 mmol). **2cb** was purified by silica-gel column chromatography (hexane/ethyl acetate, 40:1).

### (D) Carboxylation Reactions

To a 10 mL test tube was placed a benzylsilane **2** (0.1 mmol, 1.0 equiv), then evacuated and backfilled with  $\text{CO}_2$  (x3). To the reaction tube was added 1.0 mL of DMF (0.1 M) and flame-dried CsF. The

resultant mixture was then stirred at 100 °C for 1 h under 1 atm of CO<sub>2</sub> (balloon). After monitoring the progress of the reaction by a TLC, the reaction mixture was cooled to room temperature, then treated with Cs<sub>2</sub>CO<sub>3</sub> (65.1 mg, 2.0 equiv) and MeI (28.4 mg, 12.5 μL, 2.0 equiv) and stirred at room temperature for 30 min. 20 mL of water was added and the product was extracted with ethyl acetate (5 mL x3). The combined organic layer was washed with water (x1) and brine (x1), and then dried over with Na<sub>2</sub>SO<sub>4</sub>. After removal of solvent under reduced pressure, the yields of corresponding esters **3** and protodesilylation compounds were determined by <sup>1</sup>H NMR analysis using 1,1,2,2-tetrachloroethane as an internal standard.

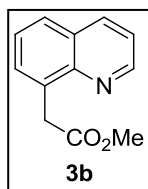

**Methyl 2-(quinolin-8-yl)acetate (3b):** 8-Triethylsilylmethylquinoline (25.7 mg, 0.1 mmol) was treated with CsF (45.6 mg, 0.3 mmol, 3.0 equiv) in DMF (1.0 mL) at 100 °C for 1 h, followed by the esterification with Cs<sub>2</sub>CO<sub>3</sub> (65.1 mg, 2.0 equiv) and MeI (28.4 mg, 2.0 equiv) at room temperature for 30 min, affording 91% (0.091 mmol) of the ester **3b** and 9% (8.8 μmol) of protodesilylation product **1b**.

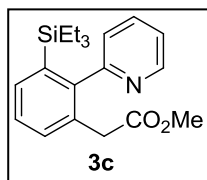

**Methyl 2-{2-(pyridin-2-yl)-3-triethylsilylphenyl}acetate (3c):** 2-(2-Triethylsilyl-6-triethylsilylmethyl)pyridine (39.8 mg, 0.1 mmol) was treated with CsF (76.0 mg, 0.5 mmol, 5.0 equiv) in DMF (1.0 mL) at 100 °C for 1 h, followed by the esterification with Cs<sub>2</sub>CO<sub>3</sub> (65.1 mg, 2.0 equiv) and MeI (28.4 mg, 2.0 equiv) at room temperature for 30 min, affording 82% (0.082 mmol) of the ester **3c** and 11% (0.011 mmol) of protodesilylation product **2ca**.

## (E) Sequential Reactions (Silylation-Carboxylation)

### (E-1) General Procedure of Silylation (method A1) -Carboxylation Sequence

To a 10 mL test tube combined with condenser was placed a substrate **1** (0.4 mmol, 1.0 equiv), then evacuated and backfilled with argon (x3). To the reaction tube was added 0.20 mL of toluene (2.0 M), [Ir(cod)Cl]<sub>2</sub> (13.4 mg, 20 μmol, 5 mol %), and Et<sub>3</sub>SiH (232.6 mg, 320 μL, 2.0 mmol, 5.0 equiv). The resulting mixture was stirred under reflux for 20 h. After monitoring the progress of the C-H silylation reaction by a TLC, the system was directly pumped up at room temperature to remove volatile materials such as toluene and Et<sub>3</sub>SiH, followed by the introduction of CO<sub>2</sub> (balloon). To the residue was added 4.0 mL of DMF (0.1 M) and flame-dried CsF (182.3 mg, 1.2 mmol, 3.0 equiv). The mixture was heated at 100 °C under 1 atm of CO<sub>2</sub> for 2 h. The reaction mixture was then cooled down to room temperature and treated with Cs<sub>2</sub>CO<sub>3</sub> (260.6 mg, 0.8 mmol, 2.0 equiv) and MeI (113.6 mg, 50 μL, 0.8 mmol, 2.0 equiv), and then stirred at room temperature for 30 min. 40 mL of water was added and iridium impurity was filtered off. The filtrate was extracted with ethyl acetate (10 mL x3) and the combined organic layer was washed with water (x1) and brine (x1), and then dried over with Na<sub>2</sub>SO<sub>4</sub>. After removal of solvent under reduced pressure, the residue was purified by flash silica-gel column chromatography to give the corresponding ester **3** and protodesilylation compound.

### (E-1) General Procedure of Silylation (method B2) -Carboxylation Sequence

To a 10 mL sealed tube was placed a substrate **1** (0.3 mmol, 1.0 equiv), then evacuated and backfilled with argon (x3). To the reaction tube was added Ru<sub>3</sub>(CO)<sub>12</sub> (11.5 mg, 0.018 mmol, 6 mol %), norbornene (197.7 mg, 2.1 mmol, 7.0 equiv), 0.15 mL of toluene (2.0 M), and Et<sub>3</sub>SiH (244.2 mg, 0.34 mL, 2.1 mmol, 7.0 equiv). The system was closed and stirred at 150 °C for 20 h. After monitoring the progress of the C-H silylation reaction by a TLC, the system was directly pumped up at room temperature to remove volatile materials such as toluene, Et<sub>3</sub>SiH, and norbornene, followed by the introduction of CO<sub>2</sub> (balloon). To the residue was added 3.0 mL of DMF (0.1 M) and flame-dried CsF (227.9 mg, 1.5 mmol, 5.0 equiv). The mixture was heated at 100 °C under 1 atm of CO<sub>2</sub> for 2 h. The reaction mixture was then cooled down to room temperature and treated with Cs<sub>2</sub>CO<sub>3</sub> (195.5 mg, 0.6 mmol, 2.0 equiv) and MeI (85.2 mg, 38 µL, 0.6 mmol, 2.0 equiv), and then stirred at room temperature for 30 min. 40 mL of water was added and ruthenium impurity was filtered off. The filtrate was extracted with ethyl acetate (10 mL x3) and the combined organic layer was washed with water (x1) and brine (x1), and then dried over with Na<sub>2</sub>SO<sub>4</sub>. After removal of solvent under reduced pressure, the residue was purified by flash silica-gel column chromatography to give the corresponding ester **3** and protodesilylation compound.

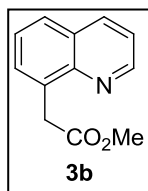

**Methyl 2-(quinolin-8-yl)acetate (3b):** 8-Methylquinoline (57.3 mg, 0.4 mmol) was used as a substrate. After the silylation by using the **method A1** ([Ir(cod)Cl]<sub>2</sub>: 13.4 mg, 20 µmol, 5 mol %; Et<sub>3</sub>SiH: 232.6 mg, 2.0 mmol, 5.0 equiv; toluene: 0.2 mL, reflux for 20 h), toluene was removed under reduced pressure and the residue was treated with CsF (182.3 mg, 1.2 mmol, 5.0 equiv) in DMF (4.0 mL) at 100 °C for 2 h, followed by the esterification with Cs<sub>2</sub>CO<sub>3</sub> (260.6 mg, 0.8 mmol, 2.0 equiv) and MeI (113.6 mg, 0.8 mmol, 2.0 equiv) at room temperature for 30 min, affording the corresponding ester **3b** (pale yellow oil, 70.2 mg, 0.35 mmol, 87%) and protodesilylation starting material **1b** (4.8 mg, 0.034 mmol, 8%). These compounds were purified by flash silica-gel column chromatography (hexane/ethyl acetate, 4:1).

IR (neat): 2951, 1738, 1595, 1500, 1435, 1343, 1261, 1173, 1002, 796 cm<sup>-1</sup>; <sup>1</sup>H NMR (500 MHz, CDCl<sub>3</sub>) δ = 8.92 (dd, *J* = 4.4, 1.5 Hz, 1H), 8.14 (dd, *J* = 8.1, 1.5 Hz, 1H), 7.76 (dd, *J* = 8.0, 1.0 Hz, 1H), 7.64 (d, *J* = 7.3 Hz, 1H), 7.50 (dd, *J* = 8.0, 7.3 Hz, 1H), 7.40 (dd, *J* = 8.1, 4.4 Hz, 1H), 4.30 (s, 2H), 3.71 (s, 3H) ppm; <sup>13</sup>C NMR (125 MHz, CDCl<sub>3</sub>) δ = 172.6, 149.7, 146.6, 136.1, 133.3, 130.2, 128.3, 127.4, 126.2, 121.1, 51.9, 36.9 ppm; HRMS (EI): *m/z* calcd for C<sub>12</sub>H<sub>11</sub>NO<sub>2</sub> [M+H<sup>+</sup>]: 201.0790, Found: 201.0790.

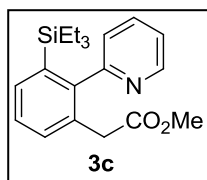

**Methyl 2-{2-(pyridin-2-yl)-3-triethylsilylphenyl}acetate (3c):** 2-(*o*-Tolyl)pyridine (50.8 mg, 0.3 mmol) was used as a substrate. After the silylation by using the **method B2** (Ru<sub>3</sub>(CO)<sub>12</sub>: 11.5 mg, 18 µmol, 6 mol %; Et<sub>3</sub>SiH: 244.2 mg, 2.1 mmol, 7.0 equiv; norbornene: 197.7 mg, 2.1 mmol, 7.0 equiv; toluene: 0.15 mL, 150 °C in closed sealed tube for 20 h), toluene was removed under reduced pressure and the residue was treated with CsF (227.9 mg, 1.5 mmol, 5.0 equiv) in DMF (3.0 mL) at 100 °C for 2 h, followed by the esterification with Cs<sub>2</sub>CO<sub>3</sub> (195.5 mg, 0.6 mmol, 2.0 equiv) and MeI (85.2 mg, 0.6 mmol, 2.0 equiv) at room temperature for 30 min, affording the corresponding ester **3c** (pale yellow solid, 83.0 mg, 0.24 mmol, 81%) and protodesilylation compound **2ca** (11.9 mg, 0.042 mmol, 14%). These compounds were purified by flash silica-gel column chromatography (hexane/ethyl acetate, 4:1).

mp. 53.2-54.0 °C; IR (neat): 2952, 1740, 1587, 1417, 1336, 1259, 1236, 1160, 1006, 754, 730 cm<sup>-1</sup>; <sup>1</sup>H

NMR (500 MHz,  $\text{CDCl}_3$ )  $\delta$  = 8.66 (d,  $J$  = 4.5 Hz, 1H), 7.69 (dd,  $J$  = 8.0, 7.0 Hz, 1H), 7.52 (d,  $J$  = 7.0 Hz, 1H), 7.37-7.32 (m, 2H), 7.30-7.28 (m, 2H), 3.55 (s, 3H), 3.39 (s, 2H), 0.80 (t,  $J$  = 8.0 Hz, 9H), 0.35 (q,  $J$  = 8.0 Hz, 6H) ppm;  $^{13}\text{C}$  NMR (125 MHz,  $\text{CDCl}_3$ )  $\delta$  = 172.1, 160.2, 148.9, 147.1, 136.1, 135.5, 134.6, 131.9, 130.8, 127.4, 125.4, 122.4, 51.7, 38.9, 7.4, 3.7 ppm; HRMS (EI):  $m/z$  calcd for  $\text{C}_{20}\text{H}_{27}\text{NO}_2\text{Si}$  [ $\text{M}+\text{H}^+$ ]: 341.1811, Found: 341.1809.

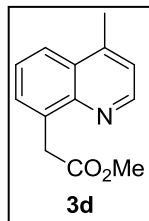

**Methyl 2-(4-methylquinolin-8-yl)acetate (3d):** 4,8-Dimethylquinoline (62.9 mg, 0.4 mmol) was used as a substrate. After the silylation by using the **method A1** ( $[\text{Ir}(\text{cod})\text{Cl}]_2$ : 13.4 mg, 20  $\mu\text{mol}$ , 5 mol %;  $\text{Et}_3\text{SiH}$ : 232.6 mg, 2.0 mmol, 5.0 equiv; toluene: 0.2 mL, reflux for 20 h), toluene was removed under reduced pressure and the residue was treated with CsF (182.3 mg, 1.2 mmol, 5.0 equiv) in DMF (4.0 mL) at 100  $^\circ\text{C}$  for 2 h, followed by the esterification with  $\text{Cs}_2\text{CO}_3$  (260.6 mg, 0.8 mmol, 2.0 equiv) and MeI (113.6 mg, 0.8 mmol, 2.0 equiv) at room temperature for 30 min, affording the corresponding ester **3d** (pale brown oil, 68.9 mg, 0.32 mmol, 80%) and protodesilylation starting material **1d** (9.0 mg, 0.057 mmol, 14%). These compounds were purified by flash silica-gel column chromatography (hexane/ethyl acetate, 2:1).

IR (neat): 2951, 1739, 1597, 1510, 1435, 1340, 1260, 1164, 1016, 842, 766  $\text{cm}^{-1}$ ;  $^1\text{H}$  NMR (500 MHz,  $\text{CDCl}_3$ )  $\delta$  = 8.76 (d,  $J$  = 4.3 Hz, 1H), 7.94 (d,  $J$  = 8.5 Hz, 1H), 7.63 (d,  $J$  = 7.1 Hz, 1H), 7.51 (dd,  $J$  = 8.5, 7.1 Hz, 1H), 7.21 (d,  $J$  = 4.3 Hz, 1H), 4.29 (s, 2H), 3.70 (s, 3H), 2.68 (s, 3H) ppm;  $^{13}\text{C}$  NMR (125 MHz,  $\text{CDCl}_3$ )  $\delta$  = 172.7, 149.3, 146.4, 144.3, 133.8, 129.9, 128.3, 125.8, 123.4, 121.9, 51.8, 37.3, 18.8 ppm; HRMS (EI):  $m/z$  calcd for  $\text{C}_{13}\text{H}_{13}\text{NO}_2$  [ $\text{M}+\text{H}^+$ ]: 215.0946, Found: 215.0947.

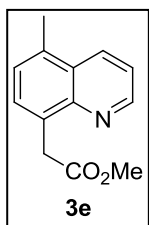

**Methyl 2-(5-methylquinolin-8-yl)acetate (3e):** 5,8-Dimethylquinoline (62.9 mg, 0.4 mmol) was used as a substrate. After the silylation by using the **method A1** ( $[\text{Ir}(\text{cod})\text{Cl}]_2$ : 13.4 mg, 20  $\mu\text{mol}$ , 5 mol %;  $\text{Et}_3\text{SiH}$ : 232.6 mg, 2.0 mmol, 5.0 equiv; toluene: 0.2 mL, reflux for 20 h), toluene was removed under reduced pressure and the residue was treated with CsF (182.3 mg, 1.2 mmol, 5.0 equiv) in DMF (4.0 mL) at 100  $^\circ\text{C}$  for 2 h, followed by the esterification with  $\text{Cs}_2\text{CO}_3$  (260.6 mg, 0.8 mmol, 2.0 equiv) and MeI (113.6 mg, 0.8 mmol, 2.0 equiv) at room temperature for 30 min, affording the corresponding ester **3e** (pale brown oil, 77.7 mg, 0.36 mmol, 90%) and protodesilylation starting material **1e** (4.3 mg, 0.027 mmol, 7%). These compounds were purified by flash silica-gel column chromatography (hexane/ethyl acetate, 2:1).

IR (neat): 2951, 1739, 1599, 1503, 1435, 1344, 1266, 1168, 1015, 795  $\text{cm}^{-1}$ ;  $^1\text{H}$  NMR (500 MHz,  $\text{CDCl}_3$ )  $\delta$  = 8.92 (dd,  $J$  = 4.2, 1.7 Hz, 1H), 8.31 (dd,  $J$  = 8.5, 1.7 Hz, 1H), 7.52 (d,  $J$  = 6.9 Hz, 1H), 7.42 (dd,  $J$  = 8.5, 4.2 Hz, 1H), 7.33 (d,  $J$  = 6.9 Hz, 1H), 4.25 (s, 2H), 3.70 (s, 3H), 2.67 (s, 3H) ppm;  $^{13}\text{C}$  NMR (125 MHz,  $\text{CDCl}_3$ )  $\delta$  = 172.9, 149.2, 146.9, 134.2, 132.6, 131.4, 129.9, 127.7, 126.6, 120.7, 51.9, 37.0, 18.6 ppm; HRMS (EI):  $m/z$  calcd for  $\text{C}_{13}\text{H}_{13}\text{NO}_2$  [ $\text{M}+\text{H}^+$ ]: 215.0946, Found: 215.0950.

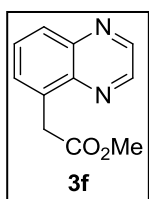

**Methyl 2-(quinoxalin-5-yl)acetate (3f):** 5-Methylquinoxaline (57.7 mg, 0.4 mmol) was used as a substrate. After the silylation by using the **method A1** ( $[\text{Ir}(\text{cod})\text{Cl}]_2$ : 26.9 mg, 40  $\mu\text{mol}$ , 10 mol %;  $\text{Et}_3\text{SiH}$ : 232.6 mg, 2.0 mmol, 5.0 equiv; toluene: 0.2 mL, reflux for 20 h), toluene was removed under reduced pressure and the residue was treated with CsF (182.3 mg, 1.2 mmol, 5.0 equiv) in DMF (4.0 mL) at 100  $^\circ\text{C}$  for 2 h, followed by the esterification

with Cs<sub>2</sub>CO<sub>3</sub> (130.3 mg, 0.4 mmol, 1.0 equiv) and MeI (113.6 mg, 0.8 mmol, 2.0 equiv) at room temperature for 30 min, affording the corresponding ester **3f** (colorless solid, 36.1 mg, 0.18 mmol, 42%) and protodesilylation starting material **1f** (17.0 mg, 0.12 mmol 29%). These compounds were purified by flash silica-gel column chromatography (hexane/ethyl acetate, 2:1).

mp. 72.7-74.1 °C; IR (neat): 2954, 1735, 1496, 1443, 1359, 1231, 1065, 999, 886, 773 cm<sup>-1</sup>; <sup>1</sup>H NMR (500 MHz, CDCl<sub>3</sub>)  $\delta$  = 8.85 (m, 2H), 8.06 (dd, *J* = 8.2, 1.4 Hz, 1H), 7.74 (dd, *J* = 8.2, 6.8 Hz, 1H), 7.70 (d, *J* = 6.8 Hz, 1H), 4.28 (s, 2H), 3.70 (s, 3H) ppm; <sup>13</sup>C NMR (125 MHz, CDCl<sub>3</sub>)  $\delta$  = 172.1, 144.9, 144.1, 143.1, 141.7, 133.7, 130.8, 129.7, 129.0, 52.1, 36.2 ppm; HRMS (EI): *m/z* calcd for C<sub>11</sub>H<sub>10</sub>N<sub>2</sub>O<sub>2</sub> [M+H<sup>+</sup>]: 202.0742, Found: 202.0741.

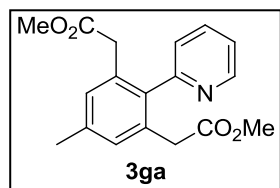

**Dimethyl 2,2'-{5-methyl-2-(pyridin-2-yl)-1,3-phenylene}diacetate (3ga):** 2-Mesitylpyridine (59.2 mg, 0.3 mmol) was used as a substrate. The silylation was carried out with the **method B2** (Ru<sub>3</sub>(CO)<sub>12</sub>: 11.5 mg, 18  $\mu$ mol, 6 mol %; Et<sub>3</sub>SiH: 244.2 mg, 2.1 mmol, 7.0 equiv; norbornene: 197.7 mg, 2.1 mmol, 7.0 equiv;

toluene: 0.15 mL, 150 °C in closed sealed tube for 20 h), toluene was removed under reduced pressure and the residue was treated with CsF (227.9 mg, 1.5 mmol, 5.0 equiv) in DMF (3.0 mL) at 100 °C for 2 h. After the esterification with Cs<sub>2</sub>CO<sub>3</sub> (293.3 mg, 0.9 mmol, 3.0 equiv) and MeI (212.9 mg, 1.5 mmol, 5.0 equiv) at room temperature for 30 min, DMF and other volatile materials were evaporated under reduced pressure, and then purified by flash silica-gel column chromatography (hexane/ethyl acetate, 2:1). The di-ester **3ga** (pale brown oil, 50.8 mg, 0.16 mmol, 54%) and mono-ester **3gb** (0.053 mmol, 18%) were obtained. The yield of **3gb** was determined by <sup>1</sup>H NMR analysis using 1,1,2,2-tetrachloroethane as an internal standard.

IR (neat): 2952, 1737, 1587, 1460, 1433, 1336, 1259, 1158, 1017, 754 cm<sup>-1</sup>; <sup>1</sup>H NMR (500 MHz, CDCl<sub>3</sub>)  $\delta$  = 8.68 (ddd, *J* = 4.0, 1.8, 1.0 Hz, 1H), 7.73 (ddd, *J* = 7.6, 6.0, 1.8 Hz, 1H), 7.29-7.26 (m, 2H), 7.10 (s, 2H), 3.56 (s, 6H), 3.39 (s, 4H), 2.37 (s, 3H) ppm; <sup>13</sup>C NMR (125 MHz, CDCl<sub>3</sub>)  $\delta$  = 171.9, 157.9, 149.5, 138.2, 138.0, 136.1, 132.5, 130.2, 125.5, 122.2, 51.8, 39.0, 21.1 ppm; HRMS (EI): *m/z* calcd for C<sub>18</sub>H<sub>17</sub>NO<sub>4</sub><sup>+</sup> [M<sup>+</sup>]: 312.1236, Found: 312.1236.

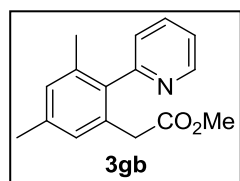

**Methyl 2-{3,5-dimethyl-2-(pyridin-2-yl)phenyl}acetate (3gb):** Pale brown oil. IR (neat): 2952, 1739, 1613, 1587, 1435, 1338, 1266, 1158, 1025, 753 cm<sup>-1</sup>; <sup>1</sup>H NMR (500 MHz, CDCl<sub>3</sub>)  $\delta$  = 8.69 (dd, *J* = 5.6, 2.0 Hz, 1H), 7.73 (ddd, *J* = 7.6, 5.6, 2.0 Hz, 1H), 7.26-7.23 (m, 2H), 7.02 (s, 1H), 7.00 (s, 1H), 3.55 (s, 3H), 3.39 (s, 2H), 2.34 (s, 3H), 2.03 (s, 3H) ppm; <sup>13</sup>C NMR (125 MHz, CDCl<sub>3</sub>)  $\delta$  = 172.2, 158.9, 149.6, 137.8, 137.7, 136.0, 132.1, 130.0, 128.5, 125.1, 121.8, 51.8, 39.0, 21.1, 20.2 ppm; HRMS (EI): *m/z* calcd for C<sub>16</sub>H<sub>15</sub>NO<sub>2</sub><sup>+</sup> [M<sup>+</sup>]: 254.1181, Found: 254.1180.

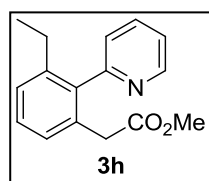

**Methyl 2-{3-ethyl-2-(pyridin-2-yl)phenyl}acetate (3h):** 2-(2-Ethyl-6-methylphenyl)-pyridine (59.2 mg, 0.3 mmol) was used as a substrate. After the silylation by using the **method B2** (Ru<sub>3</sub>(CO)<sub>12</sub>: 11.5 mg, 18  $\mu$ mol, 6 mol %; Et<sub>3</sub>SiH: 244.2 mg, 2.1 mmol, 7.0 equiv; norbornene: 197.7 mg, 2.1 mmol, 7.0 equiv; toluene: 0.15 mL, 150 °C in closed sealed tube for 20 h), toluene was removed under reduced pressure and the residue was treated with CsF



(227.9 mg, 1.5 mmol, 5.0 equiv) in DMF (3.0 mL) at 100 °C for 2 h, followed by the esterification with Cs<sub>2</sub>CO<sub>3</sub> (195.5 mg, 0.6 mmol, 2.0 equiv) and MeI (85.2 mg, 0.6 mmol, 2.0 equiv) at room temperature for 30 min, affording the corresponding ester **3h** (pale brown oil, 62.5 mg, 0.24 mmol, 82%) and protodesilylation starting material **1h** (3.2 mg, 0.016 mmol, 5%) were obtained. These compounds were purified by silica-gel column chromatography (hexane/ethyl acetate, 10:1).

IR (neat): 2966, 1739, 1584, 1454, 1426, 1338, 1258, 1160, 1025, 755 cm<sup>-1</sup>; <sup>1</sup>H NMR (500 MHz, CDCl<sub>3</sub>)  $\delta$  = 8.70 (dd, *J* = 5.4, 2.0 Hz, 1H), 7.74 (ddd, *J* = 8.0, 7.4, 1.2 Hz, 1H), 7.32 (dd, *J* = 8.0, 7.4 Hz, 1H), 7.29-7.24 (m, 3H), 7.19 (dd, *J* = 7.4, 1.2 Hz, 1H), 3.55 (s, 3H), 3.40 (s, 2H), 2.37 (q, *J* = 7.4 Hz, 2H), 1.03 (t, *J* = 7.4 Hz, 3H) ppm; <sup>13</sup>C NMR (125 MHz, CDCl<sub>3</sub>)  $\delta$  = 172.1, 158.7, 149.6, 142.3, 140.2, 136.0, 132.3, 128.4, 127.8, 127.5, 125.1, 122.0, 51.8, 39.1, 26.5, 15.3 ppm; HRMS (EI): *m/z* calcd for C<sub>16</sub>H<sub>15</sub>NO<sub>2</sub><sup>+</sup> [M<sup>+</sup>]: 254.1181, Found: 254.1183.

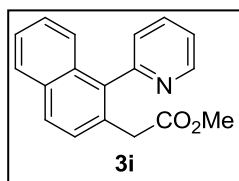

**Methyl 2-{1-(pyridin-2-yl)naphthalen-2-yl}acetate (**3i**):** 2-(2-Methylnaphthalen-1-yl)pyridine (65.7mg, 0.3 mmol) was used as a substrate. After the silylation by using the **method B2** (Ru<sub>3</sub>(CO)<sub>12</sub>: 11.5 mg, 0.018 mmol, 6 mol %; Et<sub>3</sub>SiH: 244.2 mg, 2.1 mmol, 7.0 equiv; norbornene: 197.7 mg, 2.1 mmol, 7.0 equiv; toluene: 0.15 mL, 150

°C in closed sealed tube for 20 h), toluene was removed under reduced pressure and the residue was treated with CsF (227.9 mg, 1.5 mmol, 5.0 equiv) in DMF (3.0 mL) at 100 °C for 2 h, followed by the esterification with Cs<sub>2</sub>CO<sub>3</sub> (195.5 mg, 0.6 mmol, 2.0 equiv) and MeI (85.2 mg, 0.6 mmol, 2.0 equiv) at room temperature for 30 min, affording the corresponding ester **3i** (pale brown oil, 49.8 mg, 0.18 mmol, 90%) and protodesilylation starting material **1i** (2.6 mg, 0.012 mmol, 6%) were obtained. These compounds were purified by silica-gel column chromatography (hexane/ethyl acetate, 5:1).

IR (neat): 3053, 2951, 1737, 1587, 1509, 1433, 1388, 1166, 1015, 753 cm<sup>-1</sup>; <sup>1</sup>H NMR (500 MHz, CDCl<sub>3</sub>)  $\delta$  = 8.81 (ddd, *J* = 4.0, 1.8, 1.3 Hz, 1H), 7.89 (d, *J* = 8.6 Hz, 1H), 7.87 (d, *J* = 8.0 Hz, 1H), 7.84 (ddd, *J* = 8.6, 5.8, 1.8 Hz, 1H), 7.49 (d, *J* = 8.6 Hz, 1H), 7.47-7.42 (m, 2H), 7.39-7.33 (m, 3H), 3.62 (d, *J* = 2.9 Hz, *gem*-coupling, 2H), 3.60 (s, 3H) ppm; <sup>13</sup>C NMR (125 MHz, CDCl<sub>3</sub>)  $\delta$  = 171.9, 157.9, 149.9, 137.8, 136.2, 132.7, 132.4, 129.8, 128.6, 127.9, 127.9, 126.3, 126.0, 125.8, 125.6, 122.3, 51.9, 39.1 ppm; HRMS (EI): *m/z* calcd for C<sub>18</sub>H<sub>13</sub>NO<sub>2</sub><sup>+</sup> [M<sup>+</sup>]: 276.1025, Found: 276.1026.

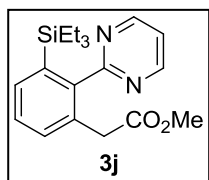

**Methyl 2-{2-(pyrimidin-2-yl)-3-triethylsilylphenyl}acetate (**3j**):** 2-(*o*-Tolyl)-pyrimidine (51.1 mg, 0.3 mmol) was used as a substrate. After the silylation by using the **method B2** (Ru<sub>3</sub>(CO)<sub>12</sub>: 11.5 mg, 18  $\mu$ mol, 6 mol %; Et<sub>3</sub>SiH: 244.2 mg, 2.1 mmol, 7.0 equiv; norbornene: 197.7 mg, 2.1 mmol, 7.0 equiv; toluene: 0.15 mL, 150 °C in

closed sealed tube for 20 h), toluene was removed under reduced pressure and the residue was treated with CsF (227.9 mg, 1.5 mmol, 5.0 equiv) in DMF (3.0 mL) at 100 °C for 2 h, followed by the esterification with Cs<sub>2</sub>CO<sub>3</sub> (195.5 mg, 0.6 mmol, 2.0 equiv) and MeI (85.2 mg, 0.6 mmol, 2.0 equiv) at room temperature for 30 min, affording the corresponding ester **3j** (pale brown solid, 51.3 mg, 0.15 mmol, 50%) and protodesilylation compound **2ja** (0.014 mmol, 5%) were obtained. **3j** was purified by silica-gel column chromatography (hexane/ethyl acetate, 4:1). The yield of **2ja** was determined by <sup>1</sup>H NMR analysis using 1,1,2,2-tetrachloroethane as an internal standard.

mp. 44.0-45.0 °C; IR (neat): 2952, 2874, 1739, 1556, 1455, 1403, 1264, 1160, 1007, 725 cm<sup>-1</sup>; <sup>1</sup>H NMR

(500 MHz, CDCl<sub>3</sub>)  $\delta$  = 8.82 (d,  $J$  = 5.1 Hz, 2H), 7.56 (dd,  $J$  = 7.3, 1.4 Hz, 1H), 7.39 (dd,  $J$  = 7.6, 7.3 Hz, 1H), 7.36 (dd,  $J$  = 7.6, 1.4 Hz, 1H), 7.29 (t,  $J$  = 5.1 Hz, 1H), 3.56 (s, 3H), 3.51 (s, 2H), 0.81 (t,  $J$  = 7.9 Hz, 9H), 0.40 (q,  $J$  = 7.9 Hz, 6H) ppm; <sup>13</sup>C NMR (125 MHz, CDCl<sub>3</sub>)  $\delta$  = 171.8, 168.7, 156.6, 145.4, 136.3, 134.8, 131.8, 131.4, 127.8, 119.4, 51.8, 39.4, 7.5, 3.8 ppm; HRMS (EI):  $m/z$  calcd for C<sub>19</sub>H<sub>26</sub>N<sub>2</sub>O<sub>2</sub>Si [M+H<sup>+</sup>]: 342.1764, Found: 342.1756.

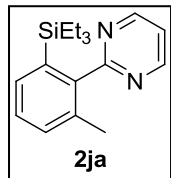

**2-(2-Methyl-6-triethylsilylphenyl)pyrimidine (2ja)**: Pale yellow oil. IR (neat): 2952, 1567, 1556, 1447, 1397, 1240, 1148, 1004, 865, 728 cm<sup>-1</sup>; <sup>1</sup>H NMR (500 MHz, CDCl<sub>3</sub>)  $\delta$  = 8.84 (d,  $J$  = 5.2 Hz, 2H), 7.44 (d,  $J$  = 7.4 Hz, 1H), 7.32-7.29 (m, 1H), 7.27-7.25 (m, 1H), 2.07 (s, 3H), 0.81 (t,  $J$  = 7.9 Hz, 9H), 0.38 (q,  $J$  = 7.9 Hz, 6H) ppm; <sup>13</sup>C NMR (125 MHz, CDCl<sub>3</sub>)  $\delta$  = 169.6, 156.7, 145.4, 135.1, 135.0, 133.2, 130.9, 127.6, 119.3, 20.1, 7.5, 3.6 ppm; HRMS (EI):  $m/z$  calcd for C<sub>17</sub>H<sub>24</sub>N<sub>2</sub>Si [M+H<sup>+</sup>]: 284.1709, Found: 284.1704.

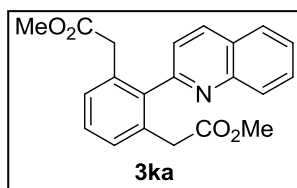

**Dimethyl 2,2'-{2-(quinolin-2-yl)-1,3-phenylene}diacetate (3ka)**: 2-(2,6-Dimethylphenyl)quinoline (55.7 mg, 0.24 mmol) was used as a substrate. After the silylation by using the **method B2** (Ru<sub>3</sub>(CO)<sub>12</sub>: 9.2 mg, 14  $\mu$ mol, 6 mol %; Et<sub>3</sub>SiH: 194.3 mg, 1.7 mmol, 7.0 equiv; norbornene: 157.3 mg, 1.7 mmol, 7.0

equiv; toluene: 0.12 mL, 150 °C in closed sealed tube for 20 h), toluene was removed under reduced pressure and the residue was treated with CsF (181.3 mg, 1.2 mmol, 5.0 equiv) in DMF (2.4 mL) at 100 °C for 2 h, followed by the esterification with Cs<sub>2</sub>CO<sub>3</sub> (233.4 mg, 0.7 mmol, 3.0 equiv) and MeI (169.4 mg, 1.2 mmol, 5.0 equiv) at room temperature for 30 min, affording the corresponding di-ester **3ka** (pale brown solid, 24.5 mg, 0.070 mmol, 29%), the mono-ester **3kb** (pale brown oil, 28.6 mg, 0.098 mmol, 41%), and protodesilylation starting material **1k** (9.0 mg, 0.039 mmol, 16%) were obtained. These compounds were purified by silica-gel column chromatography (hexane/ethyl acetate, 4:1).

mp. 75.0-76.0 °C; IR (neat): 2951, 1739, 1600, 1503, 1435, 1337, 1256, 1160, 1018, 839, 761 cm<sup>-1</sup>; <sup>1</sup>H NMR (500 MHz, CDCl<sub>3</sub>)  $\delta$  = 8.23 (d,  $J$  = 8.0 Hz, 1H), 8.10 (d,  $J$  = 8.7 Hz, 1H), 7.88 (dd,  $J$  = 8.0, 1.1 Hz, 1H), 7.76 (ddd,  $J$  = 8.7, 6.8, 1.1 Hz, 1H), 7.62-7.58 (m, 1H), 7.44 (d,  $J$  = 8.7 Hz, 1H), 7.40 (dd,  $J$  = 8.7, 6.8 Hz, 1H), 7.35 (d,  $J$  = 6.8 Hz, 2H), 3.53 (s, 6H), 3.46 (s, 4H) ppm; <sup>13</sup>C NMR (125 MHz, CDCl<sub>3</sub>)  $\delta$  = 171.7, 158.4, 147.9, 141.1, 136.2, 132.8, 129.8, 129.6, 129.5, 128.7, 127.6, 126.8, 123.1, 51.8, 39.0 ppm; HRMS (EI):  $m/z$  calcd for C<sub>21</sub>H<sub>17</sub>NO<sub>4</sub><sup>+</sup> [M<sup>+</sup>]: 348.1236, Found: 348.1236.

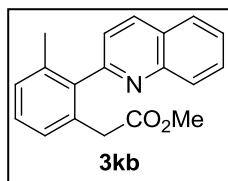

**Methyl 2-{3-methyl-2-(quinolin-2-yl)phenyl}acetate (3kb)**: IR (neat): 2951, 1738, 1600, 1502, 1434, 1250, 1159, 1044, 836, 760 cm<sup>-1</sup>; <sup>1</sup>H NMR (500 MHz, CDCl<sub>3</sub>)  $\delta$  = 8.23 (d,  $J$  = 8.0 Hz, 1H), 8.13 (d,  $J$  = 8.0 Hz, 1H), 7.88 (d,  $J$  = 8.6 Hz, 1H), 7.75 (ddd,  $J$  = 8.1, 6.9, 1.3 Hz, 1H), 7.59 (ddd,  $J$  = 8.1, 6.9, 1.3 Hz, 1H), 7.41 (d,  $J$  = 8.6 Hz, 1H), 7.31 (dd,  $J$  = 7.4, 7.4 Hz, 1H), 7.24 (m, 2H), 3.51 (s, 3H), 3.47 (s, 2H), 2.11 (s, 3H) ppm; <sup>13</sup>C NMR (125 MHz, CDCl<sub>3</sub>)  $\delta$  = 172.0, 159.4, 148.0, 140.8, 136.2, 136.2, 132.3, 129.7, 129.5, 129.3, 128.4, 128.1, 127.6, 126.8, 126.6, 123.0, 51.8, 39.0, 20.4 ppm; HRMS (EI):  $m/z$  calcd for C<sub>19</sub>H<sub>15</sub>NO<sub>2</sub><sup>+</sup> [M<sup>+</sup>]: 290.1181, Found: 290.1181.

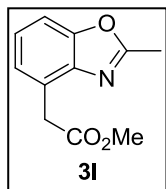

**Methyl 2-(2-methylbenzo[d]oxazol-4-yl)acetate (3I):** 2,4-Dimethylbenzoxazol (44.2 mg, 0.3 mmol) was used as a substrate. When employing the **method A1** ([Ir(cod)Cl]<sub>2</sub>: 13.4 mg, 20 μmol, 5 mol %; Et<sub>3</sub>SiH: 232.6 mg, 2.0 mmol, 5.0 equiv; toluene: 0.2 mL, reflux for 20 h), toluene was removed under reduced pressure and the residue was treated with CsF (182.3 mg, 1.2 mmol, 5.0 equiv) in DMF (4.0 mL) at 100 °C for 2 h, followed by the esterification with Cs<sub>2</sub>CO<sub>3</sub> (260.6 mg, 0.8 mmol, 2.0 equiv) and MeI (113.6 mg, 0.8 mmol, 2.0 equiv) at room temperature for 30 min, 8% (0.025 mmol) of the ester **3I** and 72% (0.22 mmol) of protodesilylation starting material **1I** were observed. These yields were determined by <sup>1</sup>H NMR analysis using 1,1,2,2-tetrachloroethane as an internal standard. On the other hand, after the silylation by using the **method B1** (Ru<sub>3</sub>(CO)<sub>12</sub>: 11.5 mg, 18 μmol, 6 mol %; Et<sub>3</sub>SiH: 174.4 mg, 1.5 mmol, 5.0 equiv; norbornene: 141.2 mg, 1.5 mmol, 5.0 equiv; toluene: 0.15 mL, 150 °C in closed sealed tube for 20 h), toluene was removed under reduced pressure and the residue was treated with CsF (136.7 mg, 0.9 mmol, 3.0 equiv) in DMF (3.0 mL) at 100 °C for 2 h, followed by the esterification with Cs<sub>2</sub>CO<sub>3</sub> (195.5 mg, 0.6 mmol, 2.0 equiv) and MeI (85.2 mg, 0.6 mmol, 2.0 equiv) at room temperature for 30 min, affording the corresponding ester **3I** (pale yellow oil, 44.2 mg, 0.22 mmol, 72%) and protodesilylation starting material **1I** (4.2 mg, 0.029 mmol, 10%) were obtained. These compounds were purified by flash silica-gel column chromatography (hexane/ethyl acetate, 4:1). IR (neat): 2952, 1582, 1433, 1341, 1246, 1165, 1042, 923, 755 cm<sup>-1</sup>; <sup>1</sup>H NMR (500 MHz, CDCl<sub>3</sub>) δ = 7.38 (d, *J* = 8.0 Hz, 1H), 7.24 (dd, *J* = 8.0, 7.5 Hz, 1H), 7.20 (d, *J* = 7.5 Hz, 1H), 4.00 (s, 2H), 3.71 (s, 3H), 2.63 (s, 3H) ppm; <sup>13</sup>C NMR (125 MHz, CDCl<sub>3</sub>) δ = 171.6, 163.6, 150.8, 140.8, 125.5, 124.8, 124.3, 109.1, 52.1, 35.9, 14.6 ppm; HRMS (EI): *m/z* calcd for C<sub>11</sub>H<sub>11</sub>NO<sub>3</sub> [M+H<sup>+</sup>]: 205.0739, Found: 205.0733.

## (F) Derivatization of the Product

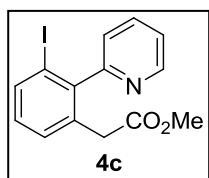

**Methyl 2-{3-iodo-2-(pyridin-2-yl)phenyl}acetate (4c):** To a solution of the ester **3c** (34.2 mg, 0.1 mmol, 1.0 equiv) in 0.5 mL of CH<sub>2</sub>Cl<sub>2</sub> was added a solution of ICl (95.9 mg, 0.6 mmol, 6.0 equiv) in 0.5 mL of CH<sub>2</sub>Cl<sub>2</sub> under Ar atmosphere and stirred under reflux for 20 h. After cooling to room temperature, the reaction was quenched by 5 mL of sat. Na<sub>2</sub>SO<sub>3</sub> aq., and then the product was extracted with CH<sub>2</sub>Cl<sub>2</sub> (5 mL x3). The combined organic layer was washed with brine (10 mL x1) and dried over Na<sub>2</sub>SO<sub>4</sub>. After concentration, the crude product was purified by flash silica-gel column chromatography (hexane/ethyl acetate, 10:1) to afford **4c** as pale yellow amorphous solid in quantitative yield (35.6 mg, 0.1 mmol). IR (neat): 2950, 1737, 1589, 1564, 1423, 1336, 1249, 1161, 1022, 750 cm<sup>-1</sup>; <sup>1</sup>H NMR (500 MHz, CDCl<sub>3</sub>) δ = 8.71 (d, *J* = 4.6 Hz, 1H), 7.87 (d, *J* = 8.0 Hz, 1H), 7.78 (dd, *J* = 7.5, 7.2 Hz, 1H), 7.34-7.28 (m, 3H), 7.07 (dd, *J* = 8.0, 7.5 Hz, 1H), 3.55 (s, 3H), 3.46 (s, 2H) ppm; <sup>13</sup>C NMR (125 MHz, CDCl<sub>3</sub>) δ = 171.3, 160.7, 149.4, 144.9, 138.1, 136.2, 133.9, 130.4, 129.9, 125.2, 122.7, 98.9, 51.9, 39.8 ppm; HRMS (EI): *m/z* calcd for C<sub>14</sub>H<sub>11</sub>INO<sub>2</sub> [M<sup>+</sup>]: 351.9835, Found: 351.9834.

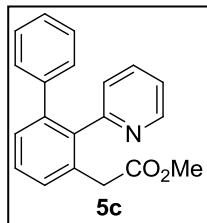

**Methyl 2-{1-phenyl-2-(pyridin-2-yl)phenyl}acetate (5c):** To a solution of **4c** (36.8 mg, 0.1 mmol, 1.0 equiv) in DMF (1.0 mL) was added PhB(OH)<sub>2</sub> (19.0 mg, 0.16 mmol, 1.5 equiv), K<sub>2</sub>CO<sub>3</sub> (43.1 mg, 0.31 mmol, 3.0 equiv), and Pd(PPh<sub>3</sub>)<sub>4</sub> (6.0 mg, 5 μmol, 5 mol %). The resulting mixture was then stirred at 100 °C for 15 h under Ar atmosphere.

After cooling to room temperature, the reaction mixture was quenched by 10 mL of water and extracted with ethyl acetate (4 mL x3). The solvent was removed under reduced pressure and the residue was purified by flash silica-gel column chromatography (hexane/ethyl acetate, 4:1) to give **5c** as pale yellow oil in 83% yield (21.6 mg, 0.87 mmol).

IR (neat): 2951, 1738, 1585, 1423, 1339, 1259, 1160, 1025, 761, 703 cm<sup>-1</sup>; <sup>1</sup>H NMR (500 MHz, CDCl<sub>3</sub>) δ = 8.62 (dd, *J* = 4.0, 1.1 Hz, 1H), 7.46-7.36 (m, 4H), 7.15-7.12 (m, 3H), 7.11-7.05 (m, 3H), 6.85 (dt, *J* = 8.0, 1.1 Hz, 1H), 3.66 (s, 2H), 3.53 (s, 3H) ppm; <sup>13</sup>C NMR (125 MHz, CDCl<sub>3</sub>) δ = 172.0, 158.6, 148.8, 141.6, 141.3, 139.4, 135.5, 133.1, 129.8, 129.6, 129.2, 128.3, 127.6, 126.4, 121.5, 51.7, 39.1 ppm; HRMS (EI): *m/z* calcd for C<sub>20</sub>H<sub>16</sub>NO<sub>2</sub><sup>+</sup> [M<sup>+</sup>]: 302.1181, Found: 302.1176.

500 MHz, CDCl<sub>3</sub>

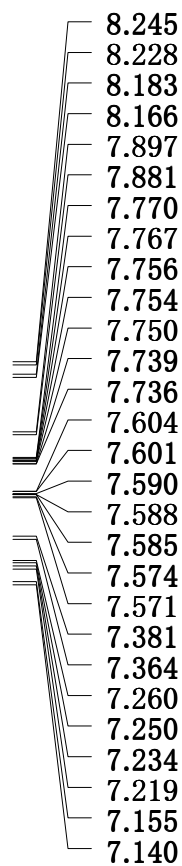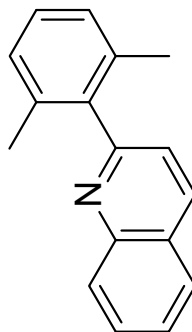

1k

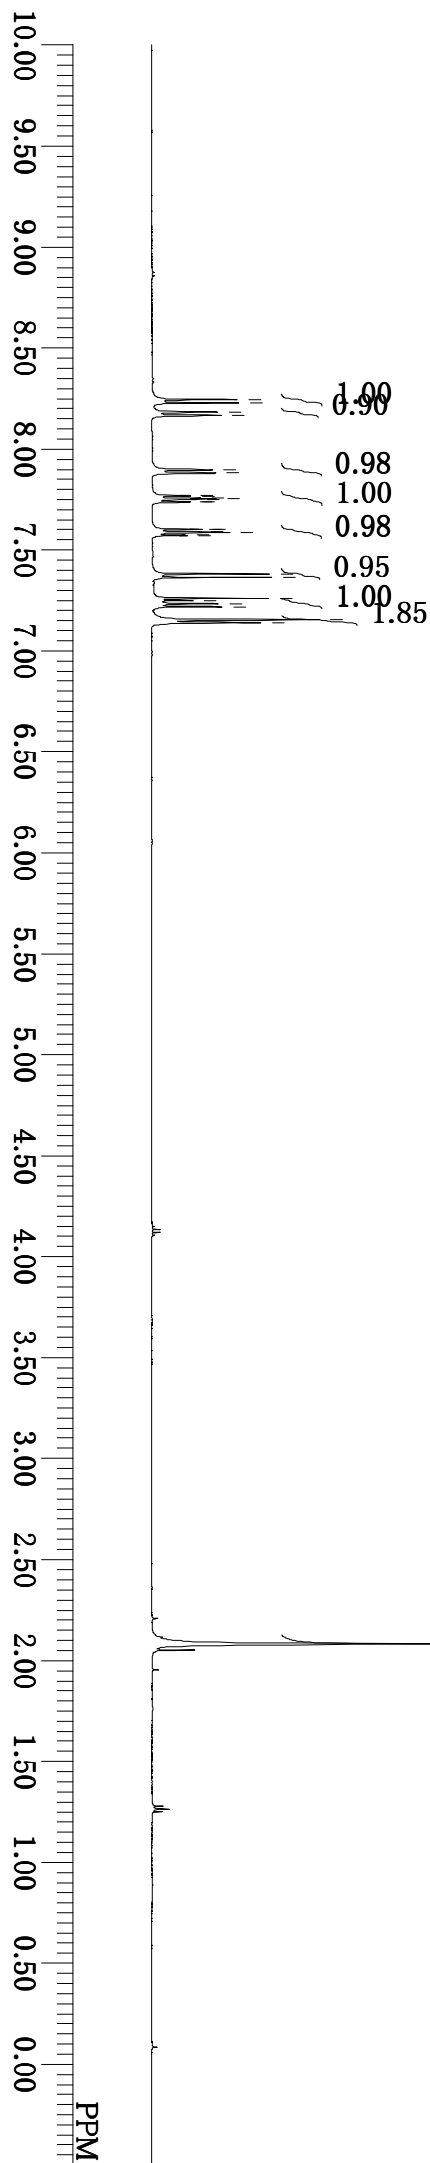

125 MHz, CDCl<sub>3</sub>

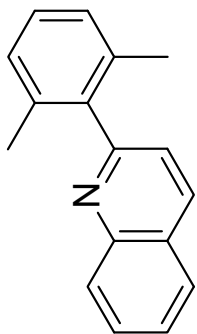

1k

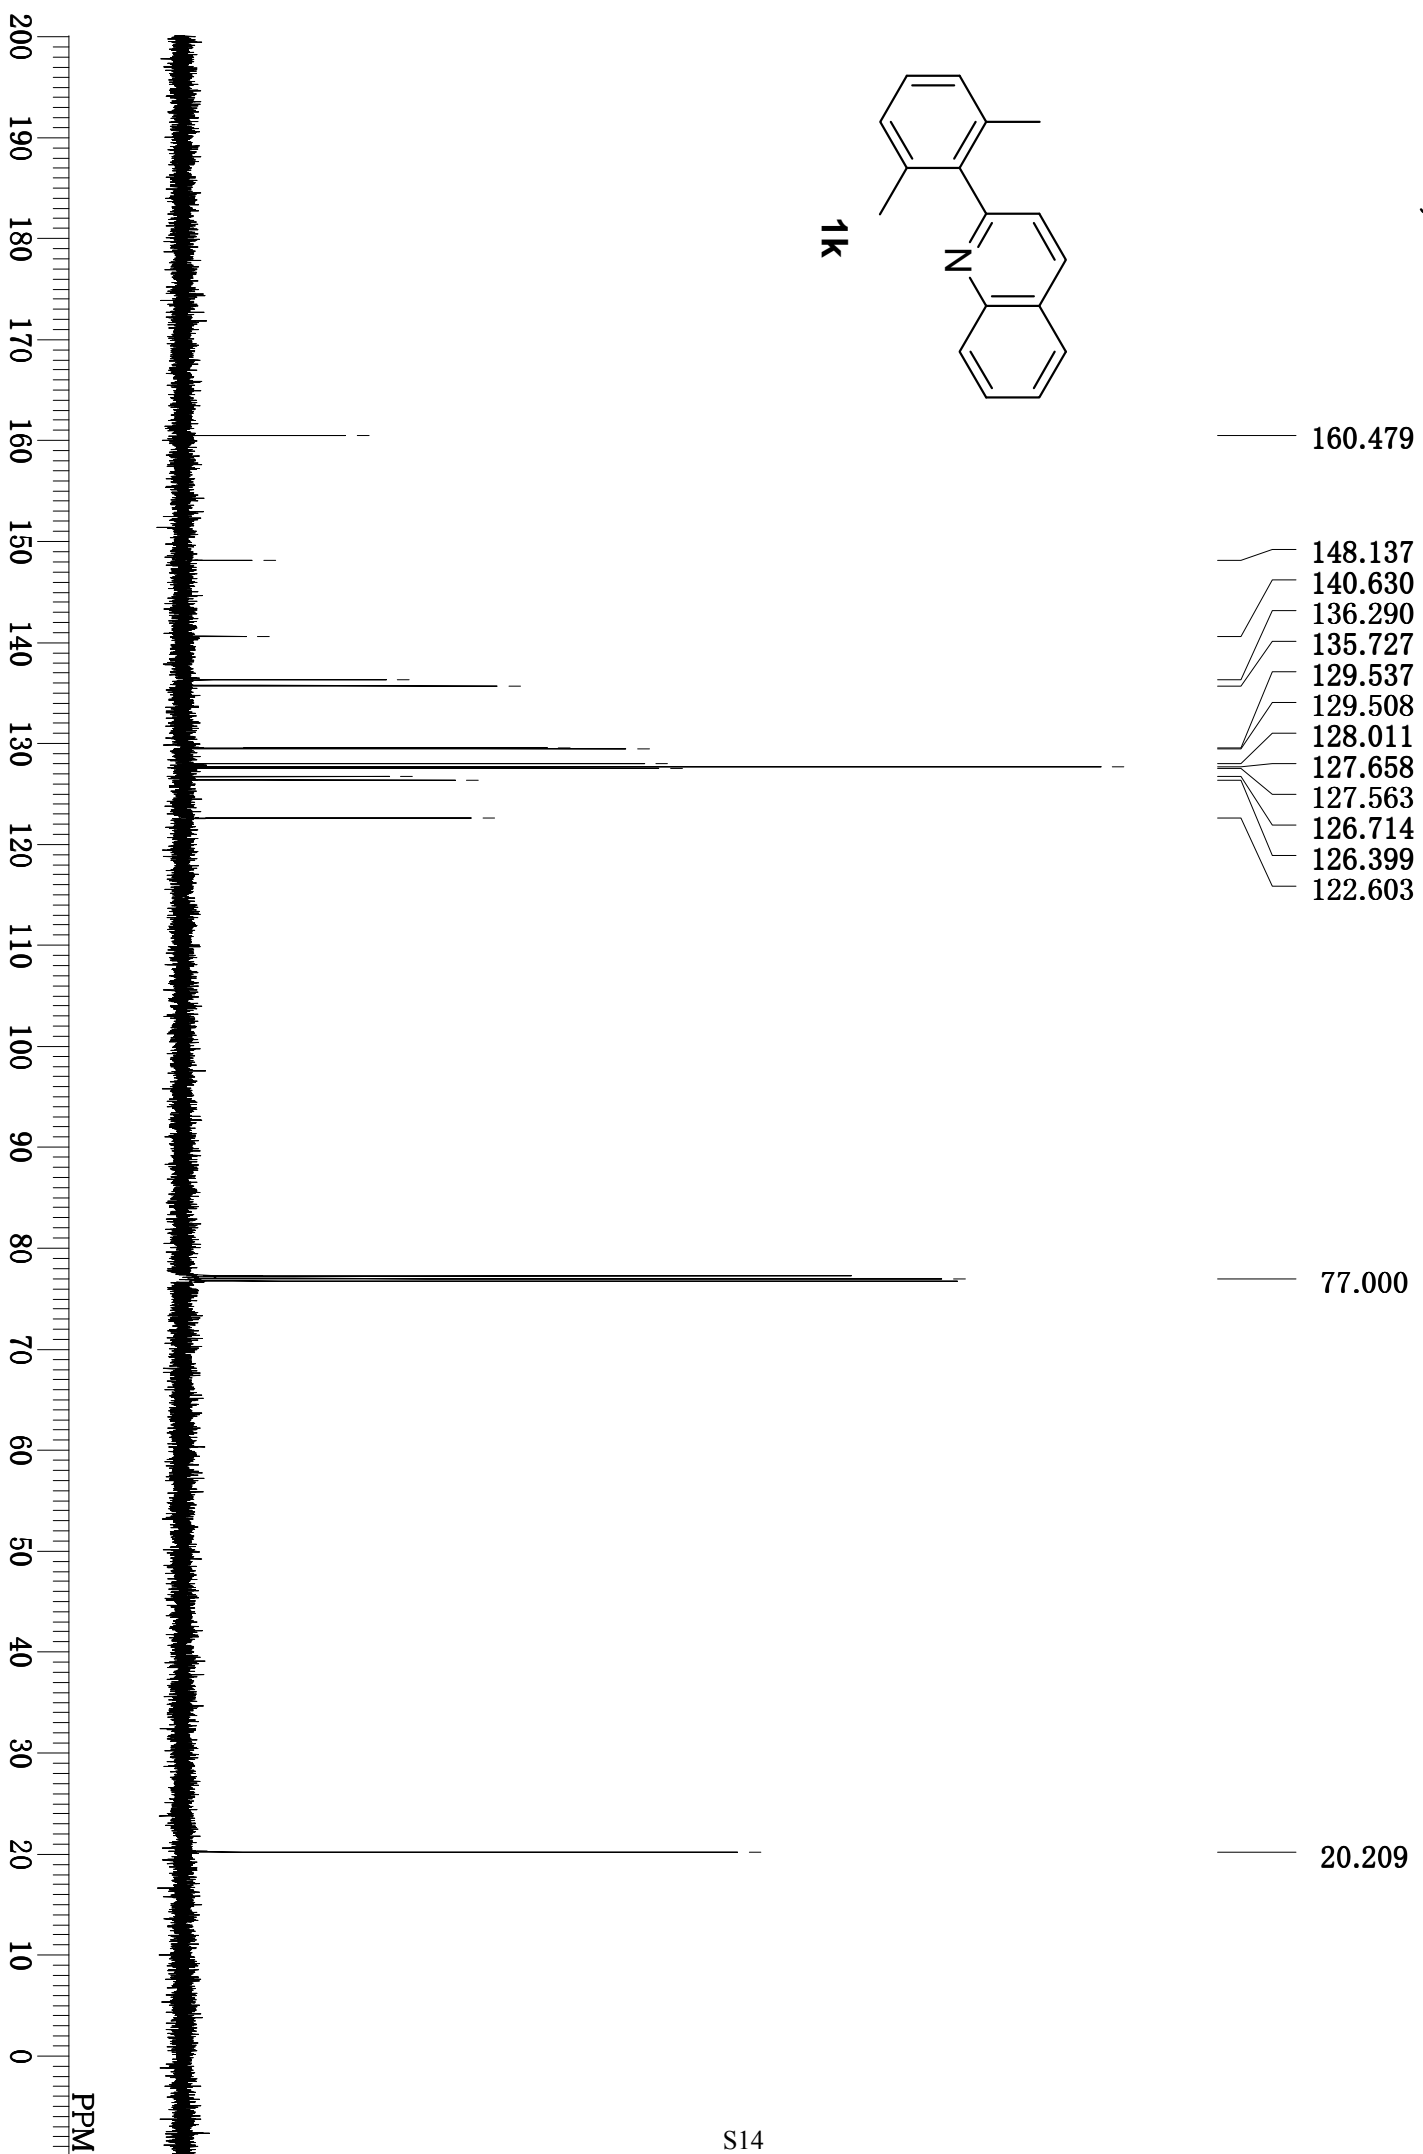

500 MHz, CDCl<sub>3</sub>

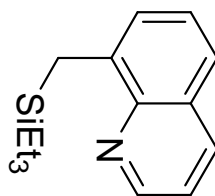

**2b**

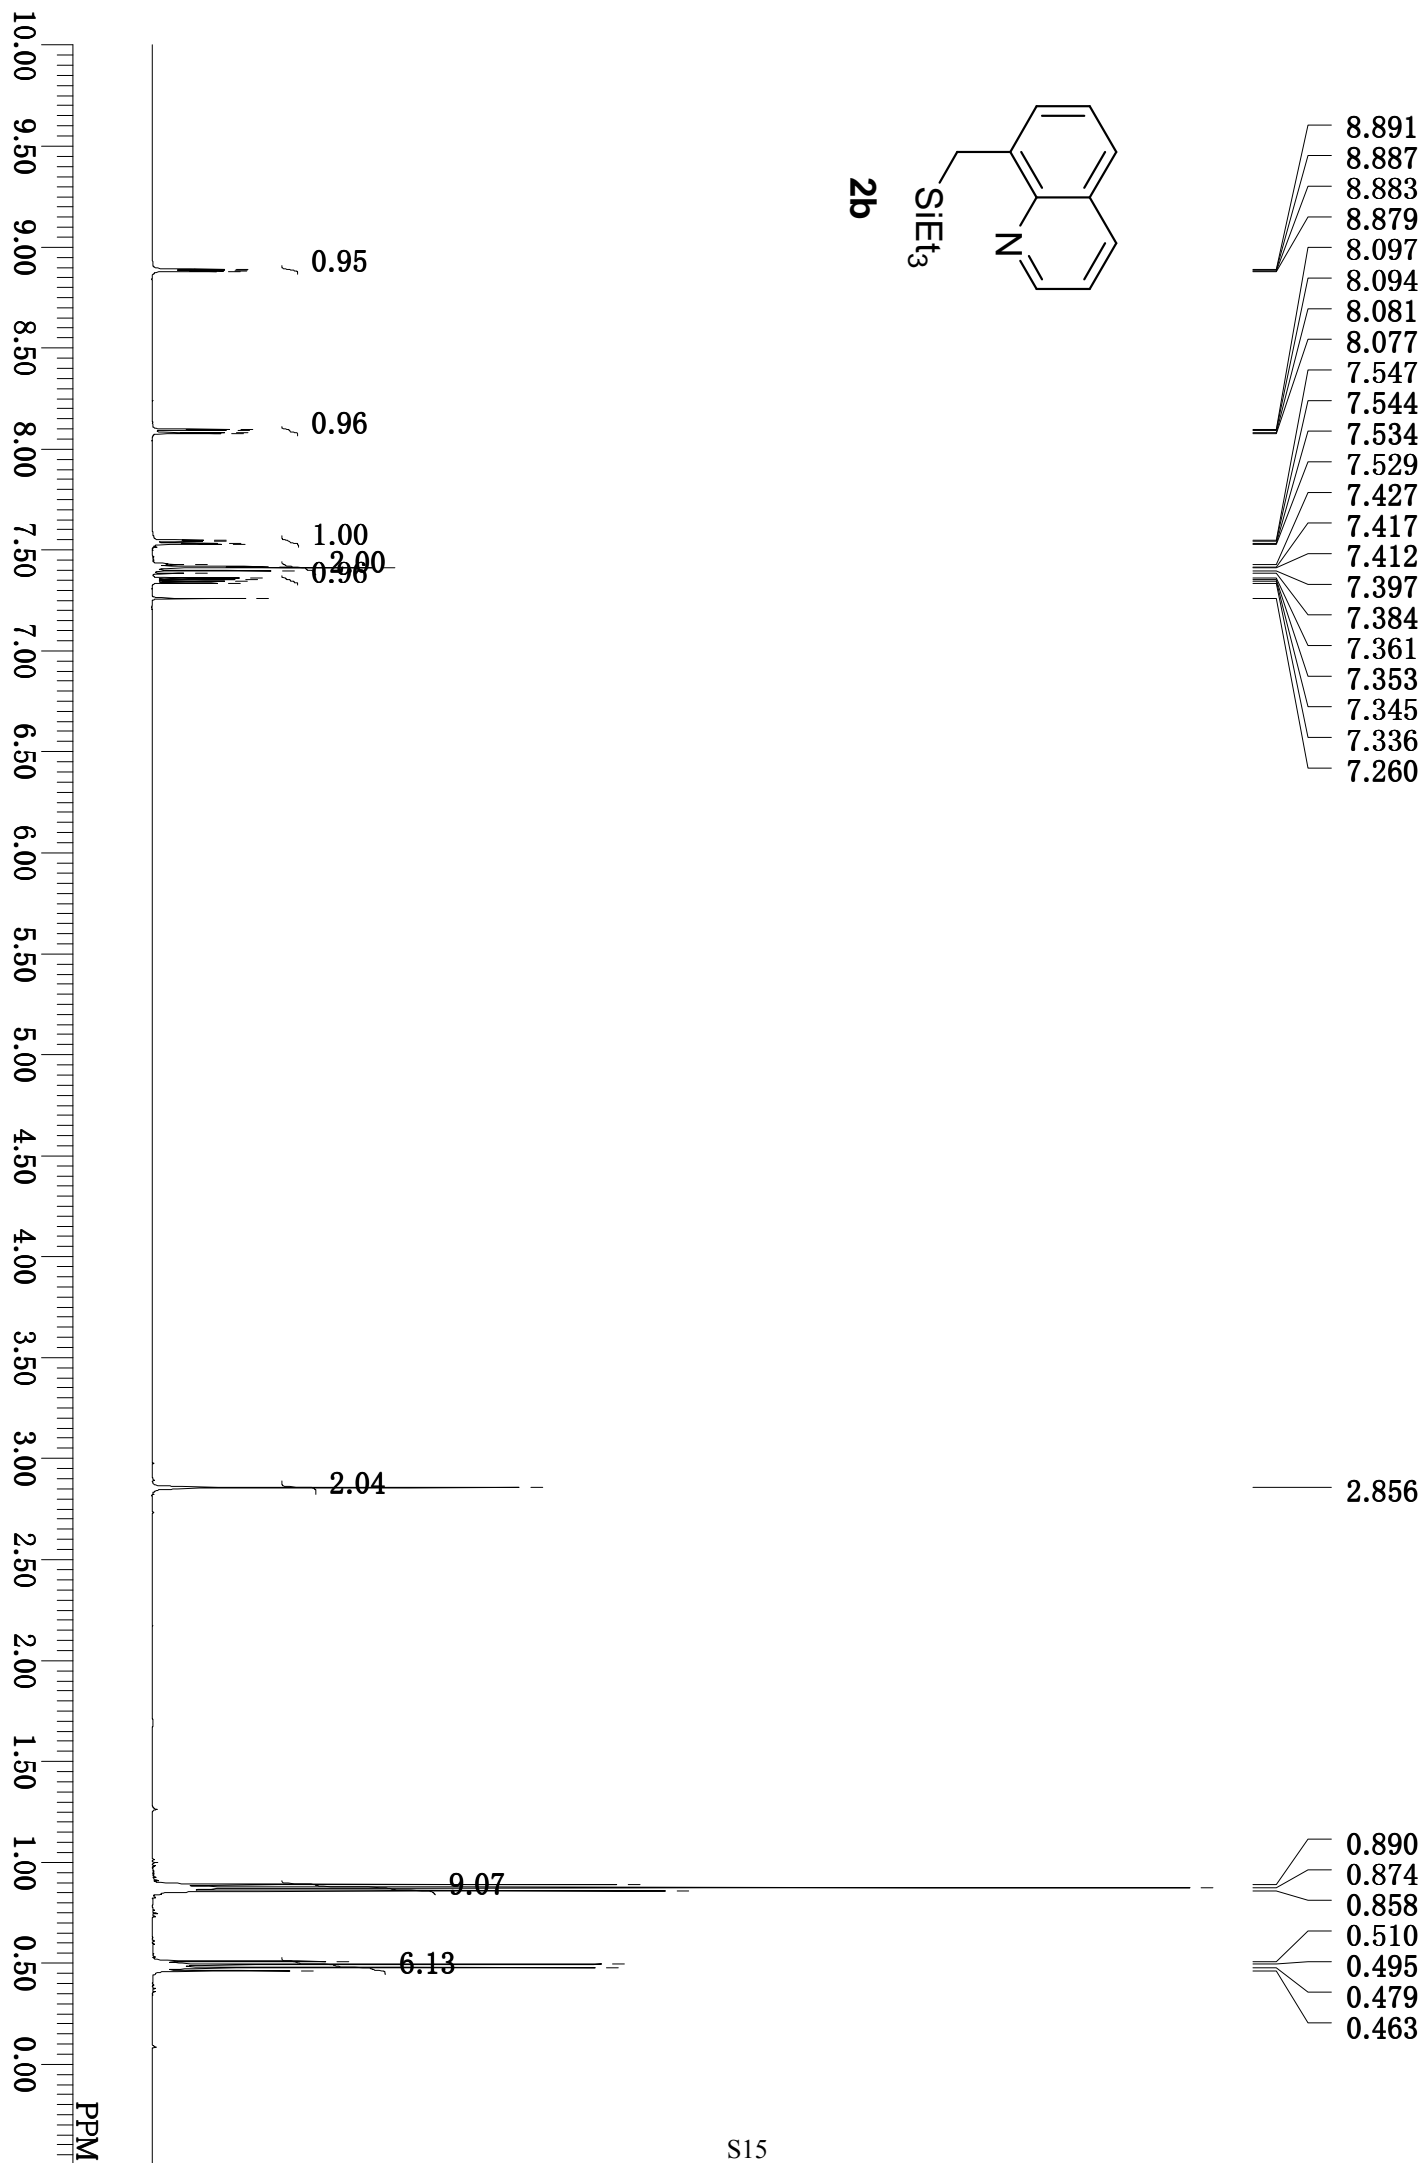

500 MHz, CDCl<sub>3</sub>

8.683  
8.681  
8.672  
7.720  
7.718  
7.705  
7.702  
7.691  
7.687  
7.443  
7.441  
7.426  
7.299  
7.284  
7.269  
7.260  
7.245

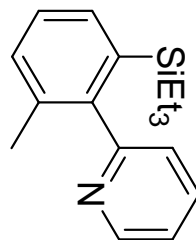

**2ca**

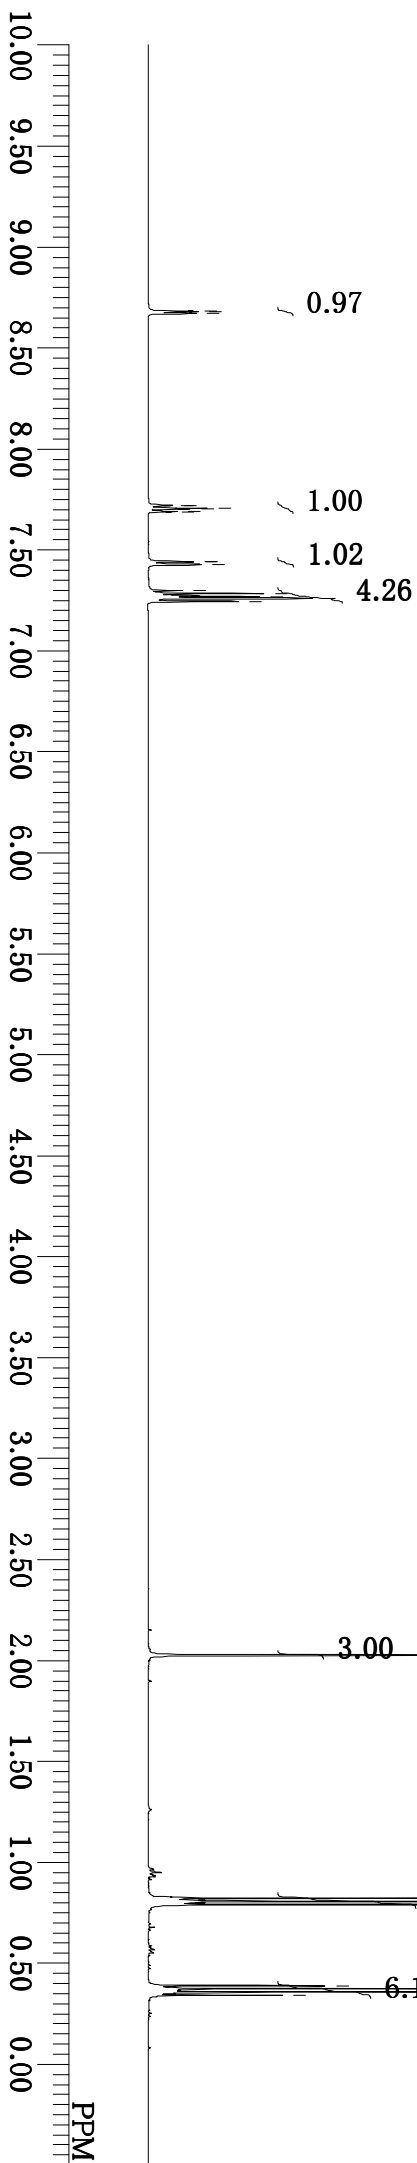

2.025

0.823  
0.807  
0.791  
0.389  
0.373  
0.358  
0.342



500 MHz, CDCl<sub>3</sub>

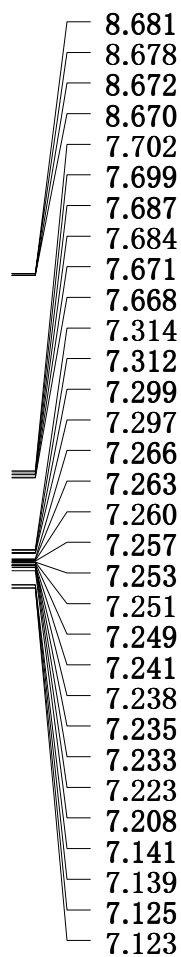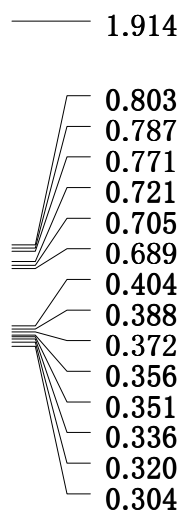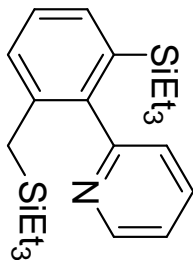

2cb

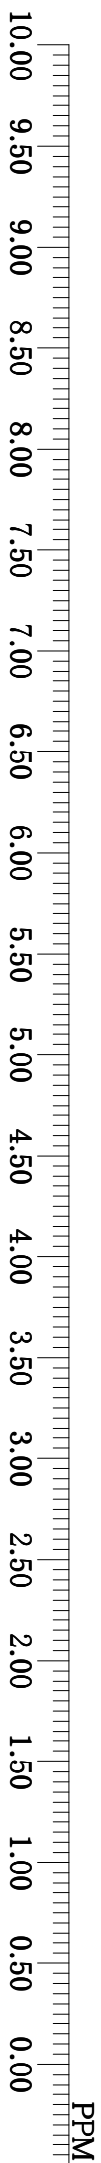

0.96

1.00

1.04

0.98

2.02

8.15

8.25

12.52

500 MHz, CDCl<sub>3</sub>

8.925  
8.922  
8.916  
8.913  
8.146  
8.143  
8.130  
8.127  
7.768  
7.766  
7.752  
7.750  
7.651  
7.637  
7.519  
7.504  
7.488  
7.408  
7.399  
7.391  
7.383  
7.260

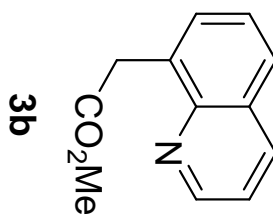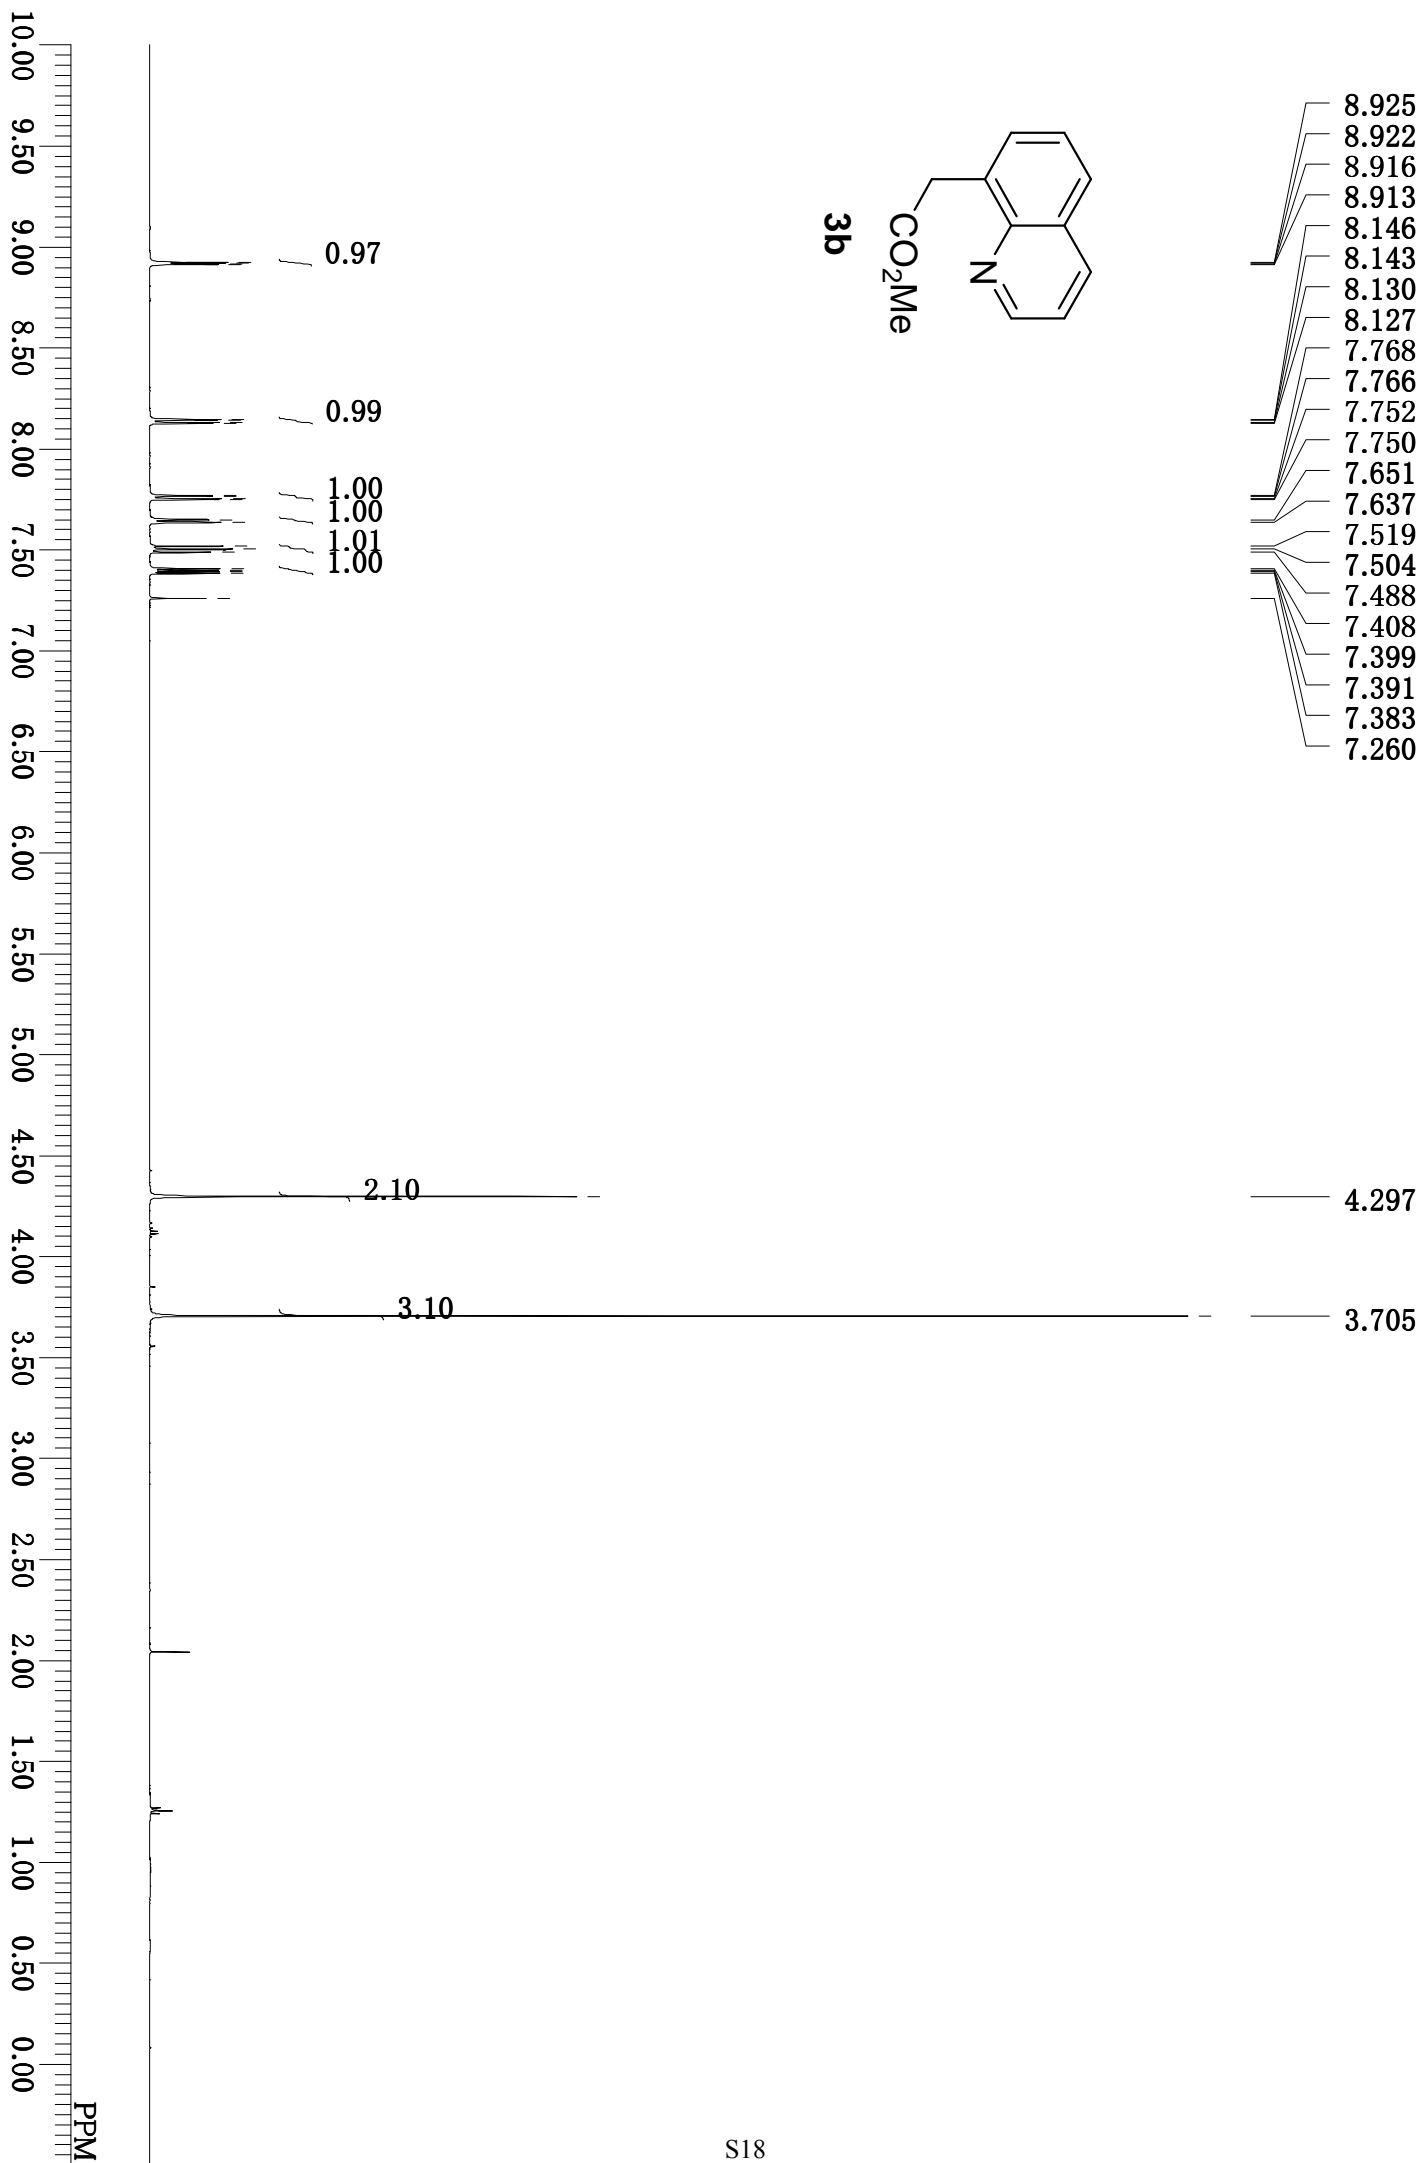

125 MHz, CDCl<sub>3</sub>

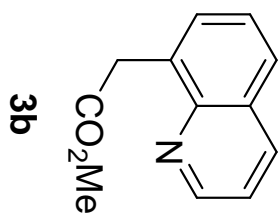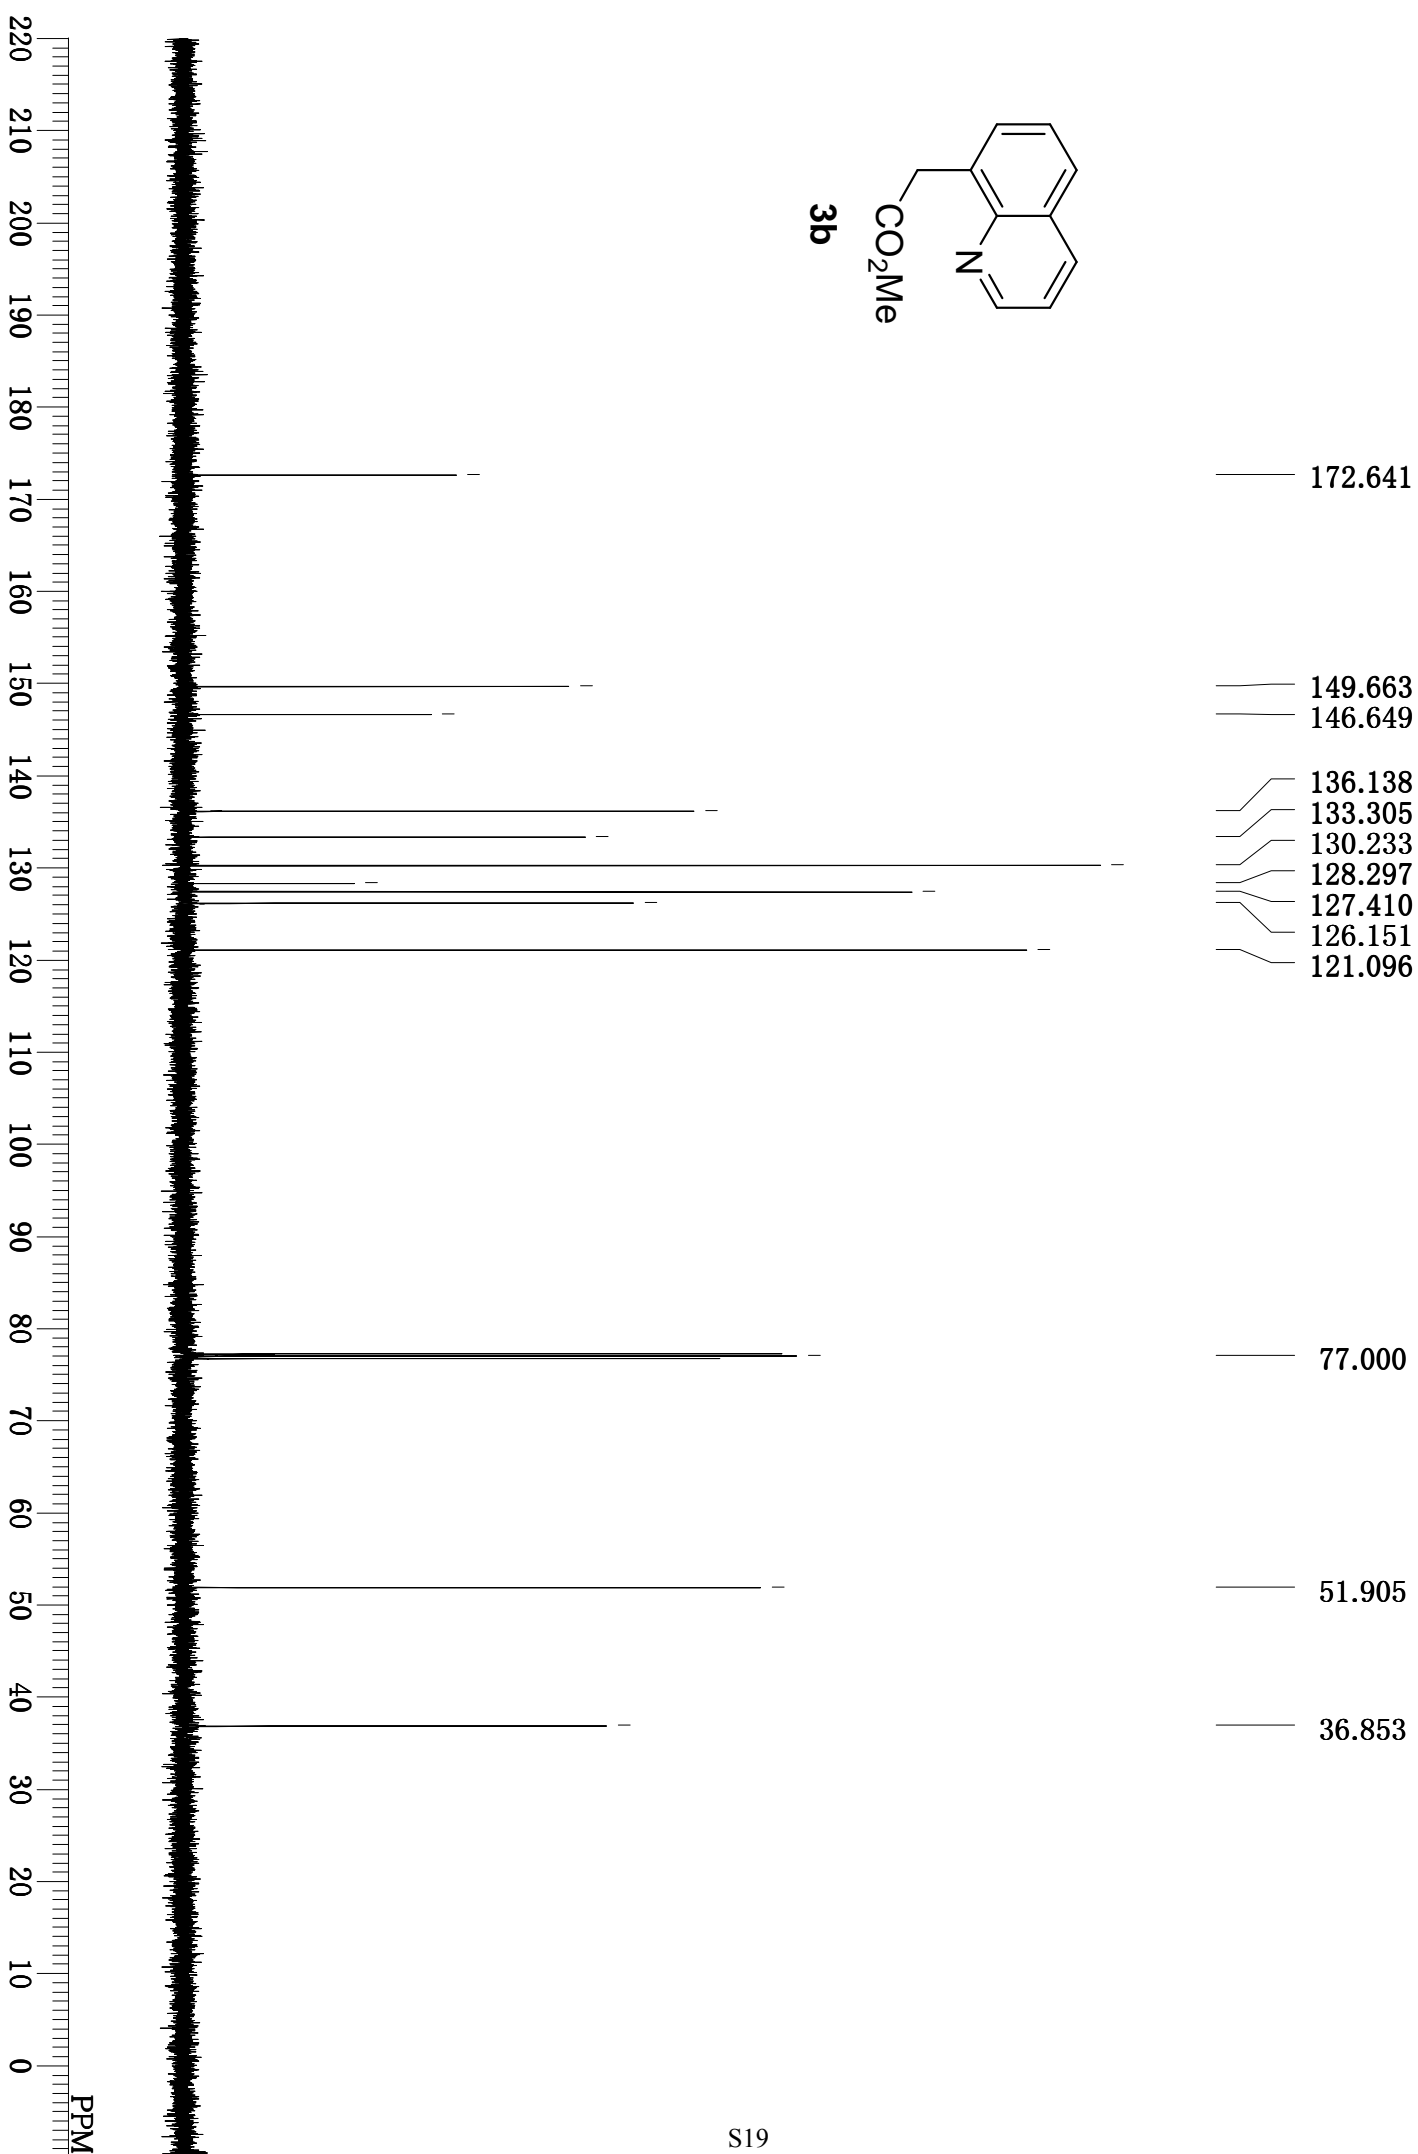

500 MHz, CDCl<sub>3</sub>

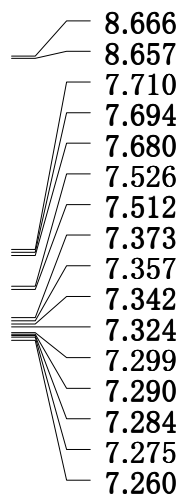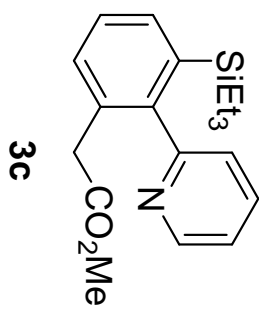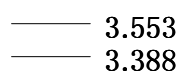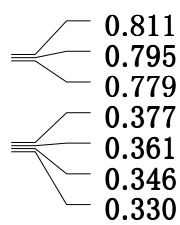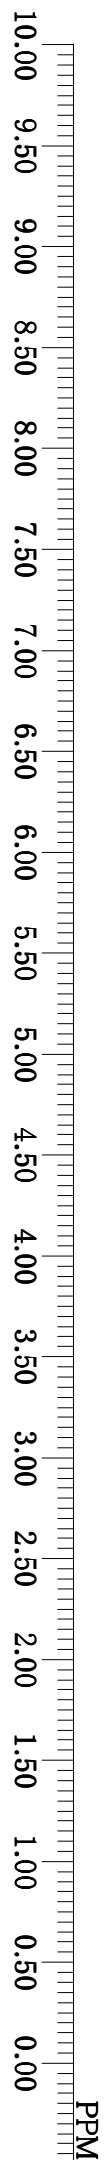

125 MHz, CDCl<sub>3</sub>

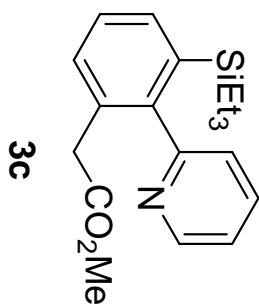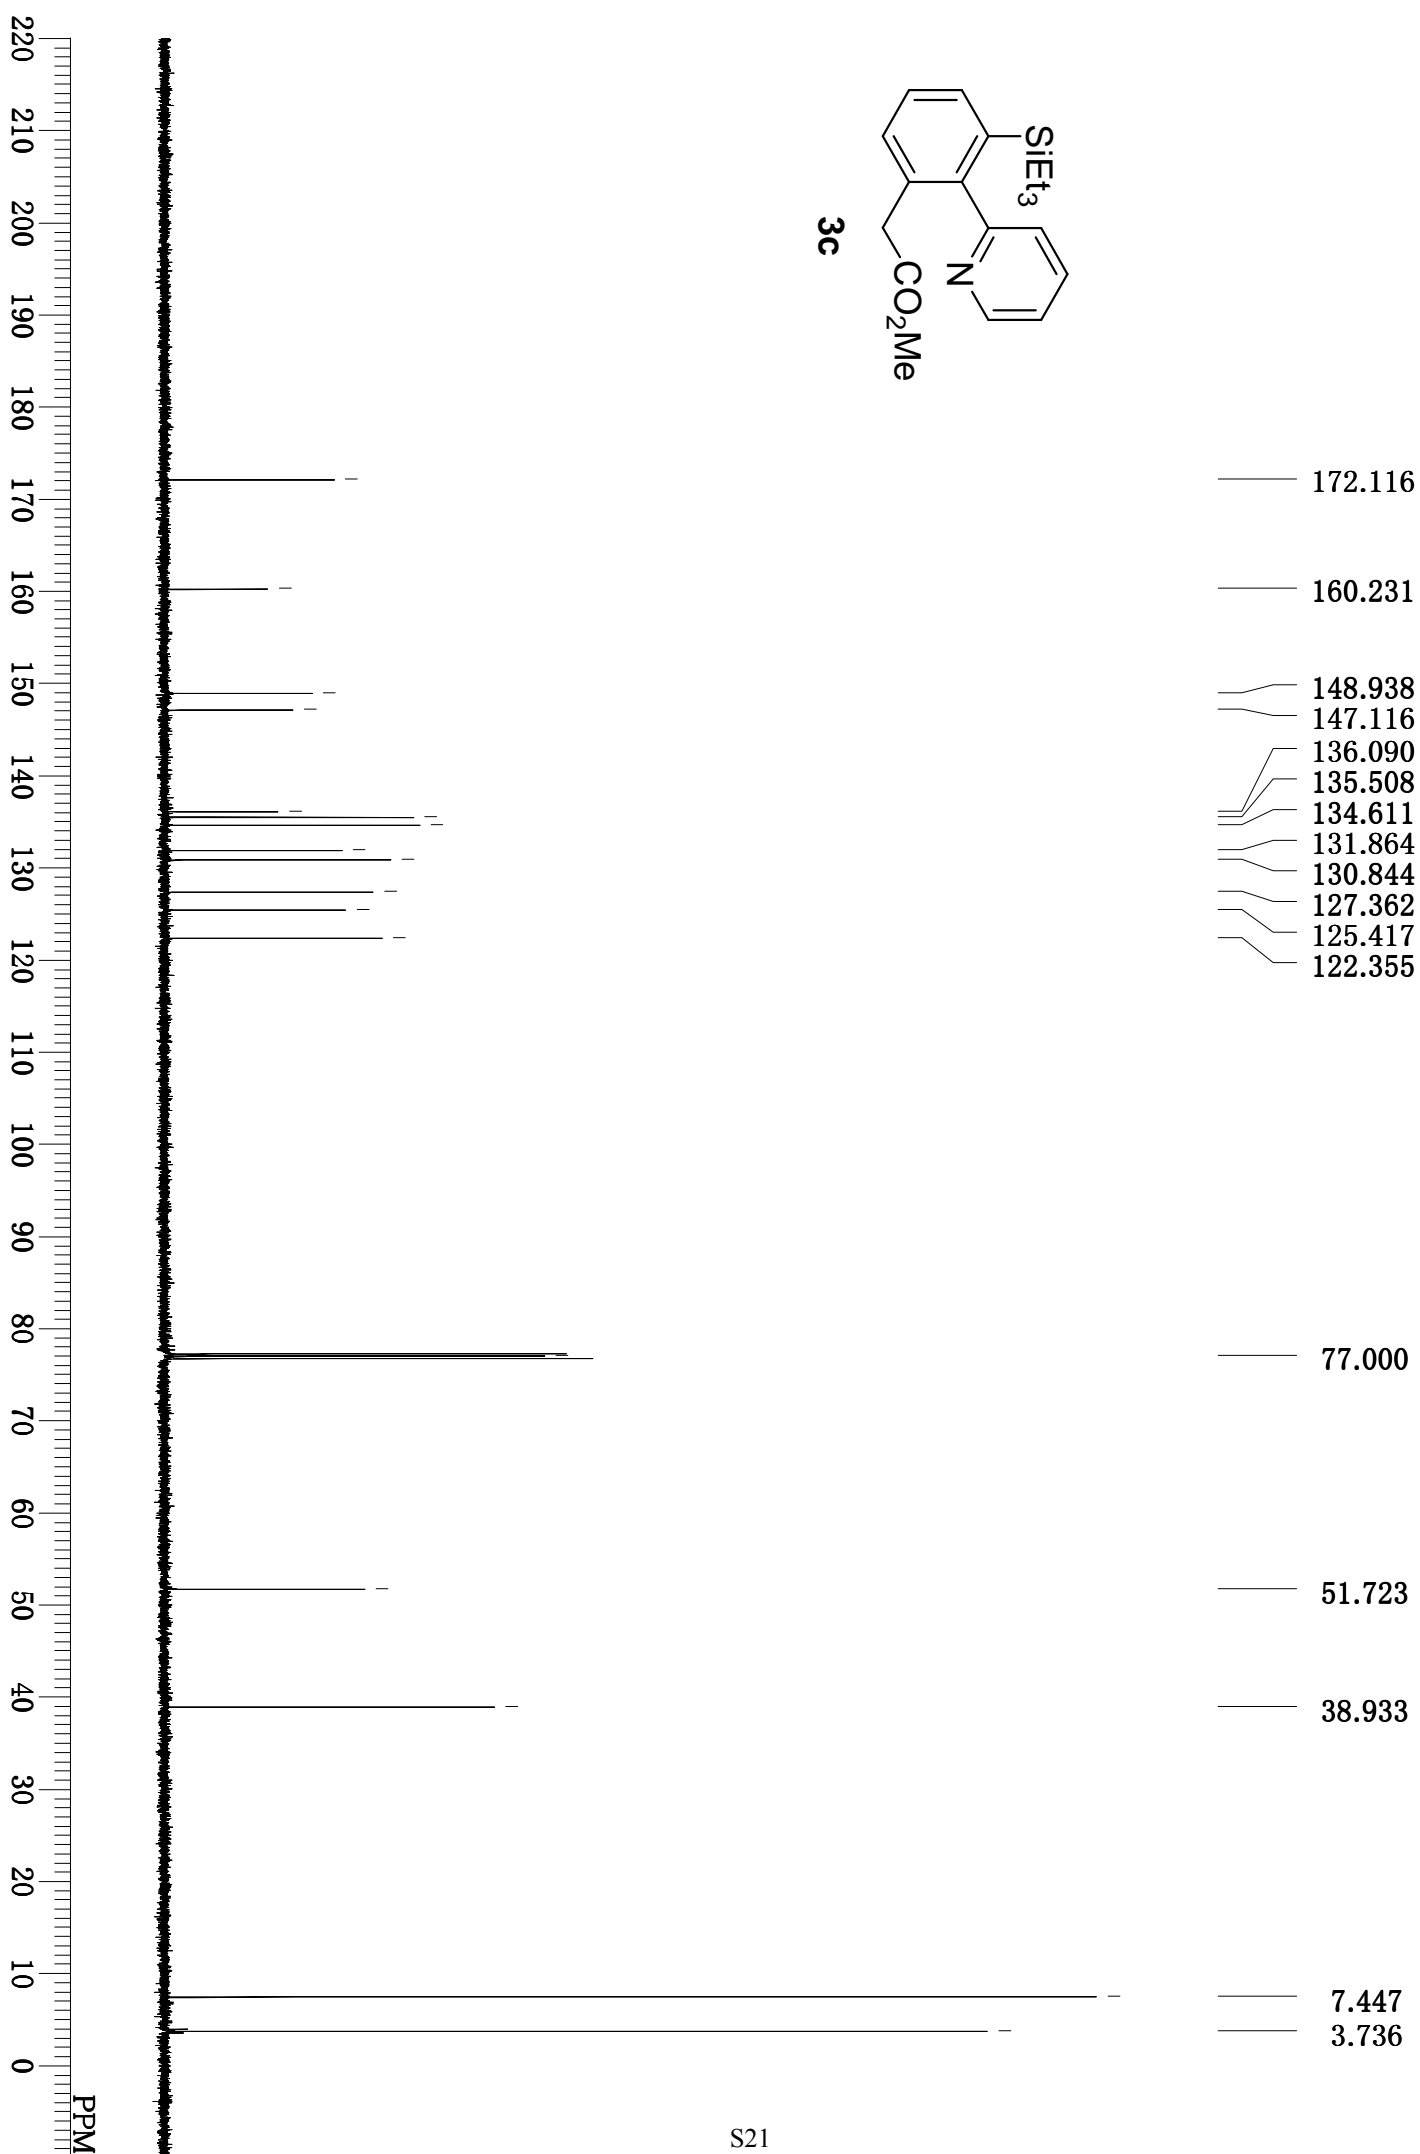

500 MHz, CDCl<sub>3</sub>

8.769  
8.760  
7.948  
7.931  
7.632  
7.618  
7.523  
7.509  
7.506  
7.492  
7.260  
7.218  
7.210

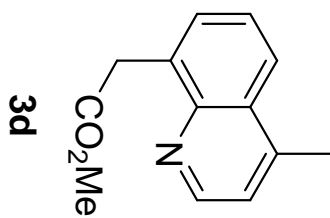

0.98

1.00

1.01

1.00

0.98

2.08

3.06

3.11

4.293

3.697

2.680

10.00 9.50 9.00 8.50 8.00 7.50 7.00 6.50 6.00 5.50 5.00 4.50 4.00 3.50 3.00 2.50 2.00 1.50 1.00 0.50 0.00  
PPM

125 MHz, CDCl<sub>3</sub>

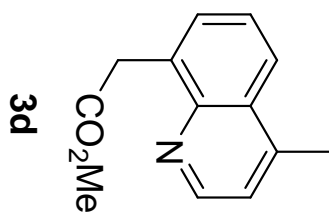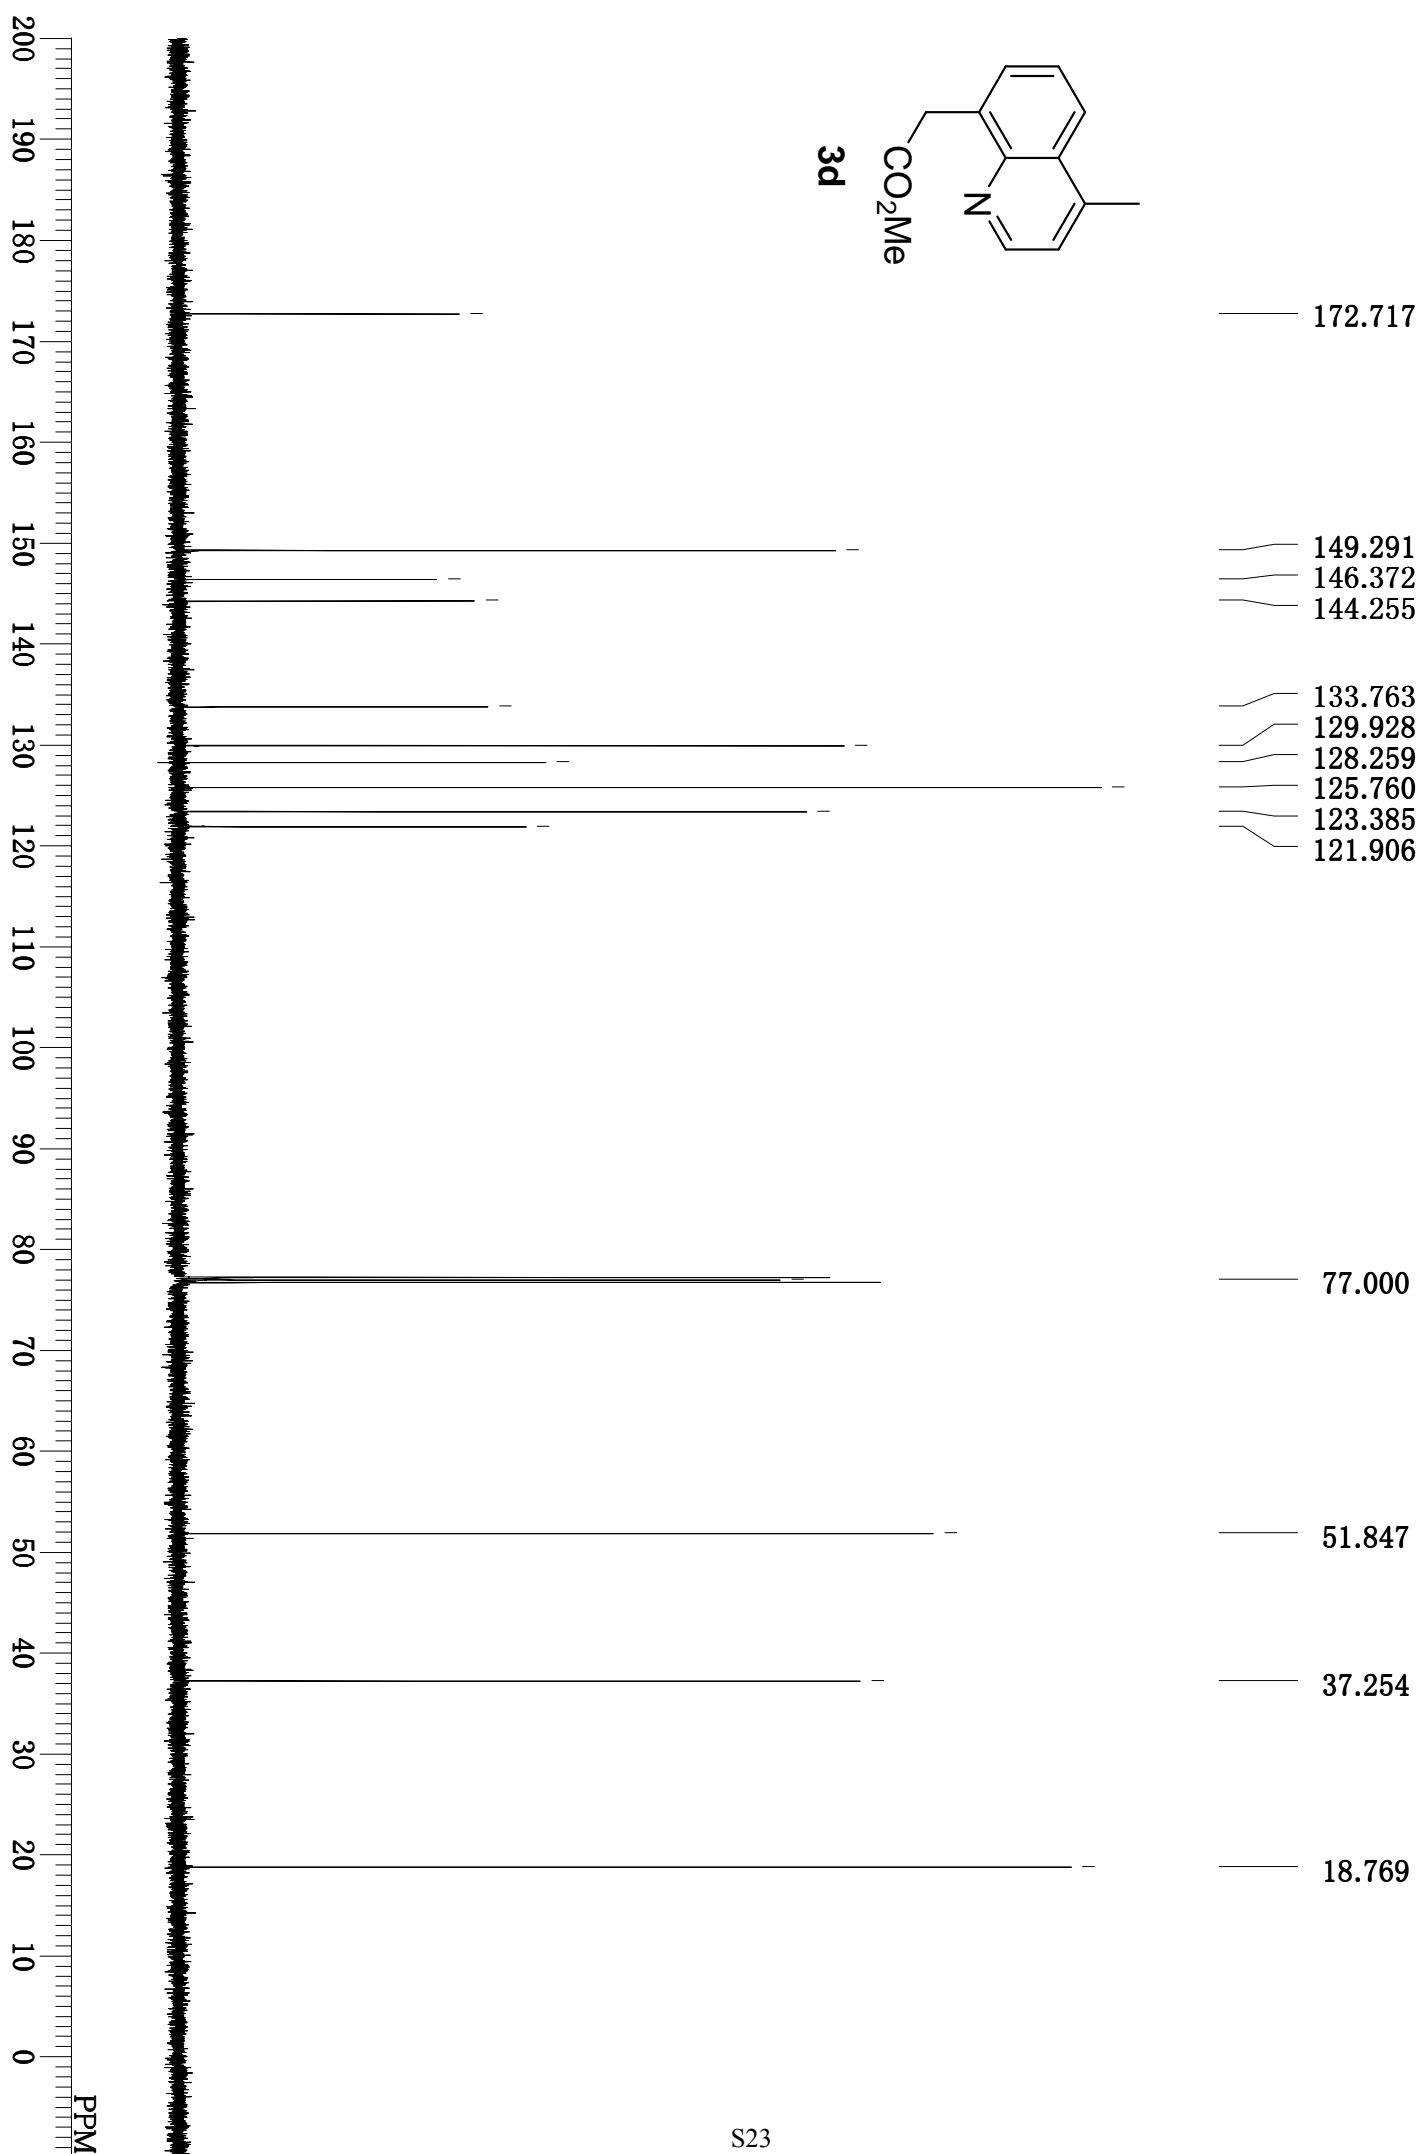

500 MHz, CDCl<sub>3</sub>

8.922  
8.918  
8.914  
8.910  
8.324  
8.320  
8.307  
8.303  
7.530  
7.517  
7.438  
7.429  
7.421  
7.412  
7.339  
7.325  
7.260

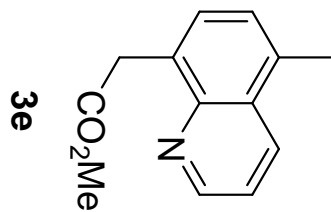

0.98

1.00

1.02

1.01

2.13

3.13

3.20

4.246

3.697

2.671

10.00 9.50 9.00 8.50 8.00 7.50 7.00 6.50 6.00 5.50 5.00 4.50 4.00 3.50 3.00 2.50 2.00 1.50 1.00 0.50 0.00  
PPM



125 MHz, CDCl<sub>3</sub>

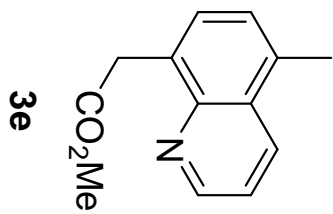

172.927

149.177  
146.859

134.173  
132.570  
131.359  
129.919  
127.696  
126.599  
120.686

77.000

51.924

37.006

18.587

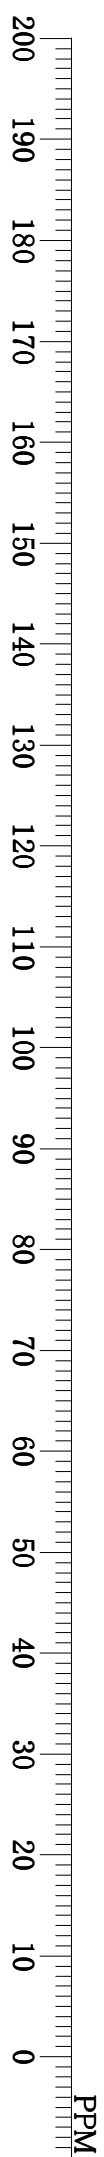

500 MHz, CDCl<sub>3</sub>

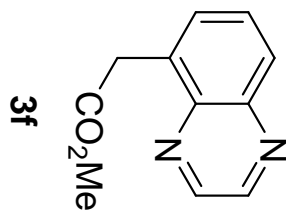

8.854  
8.851  
8.844  
8.840  
8.067  
8.064  
8.050  
8.048  
7.758  
7.743  
7.727  
7.708  
7.696  
7.260

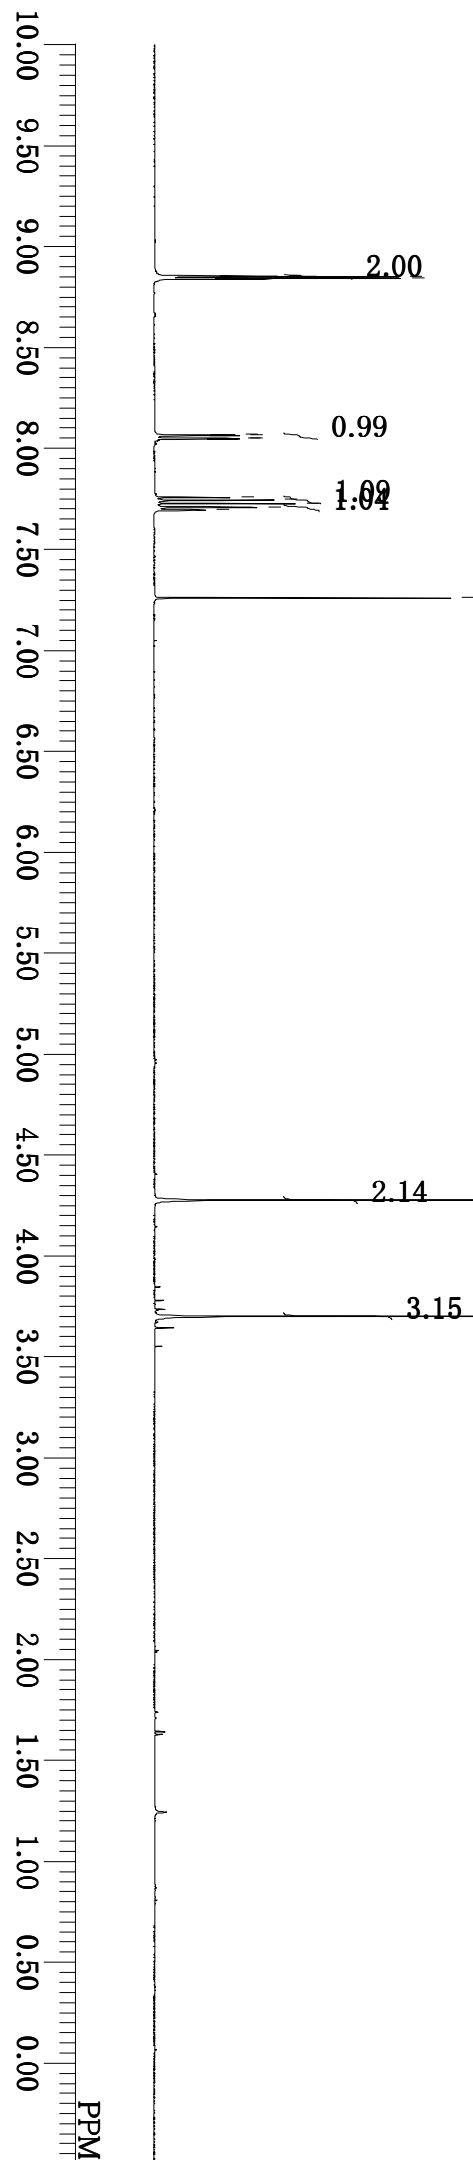

4.277  
3.700

125 MHz, CDCl<sub>3</sub>

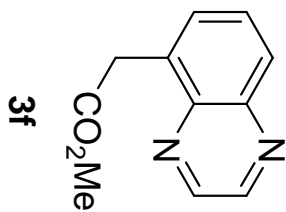

172.097

144.903  
144.131  
143.120  
141.651  
133.715  
130.834  
129.737  
129.041

77.000

52.086

36.166

200  
190  
180  
170  
160  
150  
140  
130  
120  
110  
100  
90  
80  
70  
60  
50  
40  
30  
20  
10  
0  
PPM

500 MHz, CDCl<sub>3</sub>

8.687  
8.677  
7.748  
7.744  
7.733  
7.730  
7.717  
7.713  
7.289  
7.282  
7.273  
7.260  
7.104

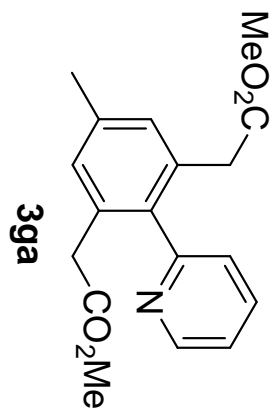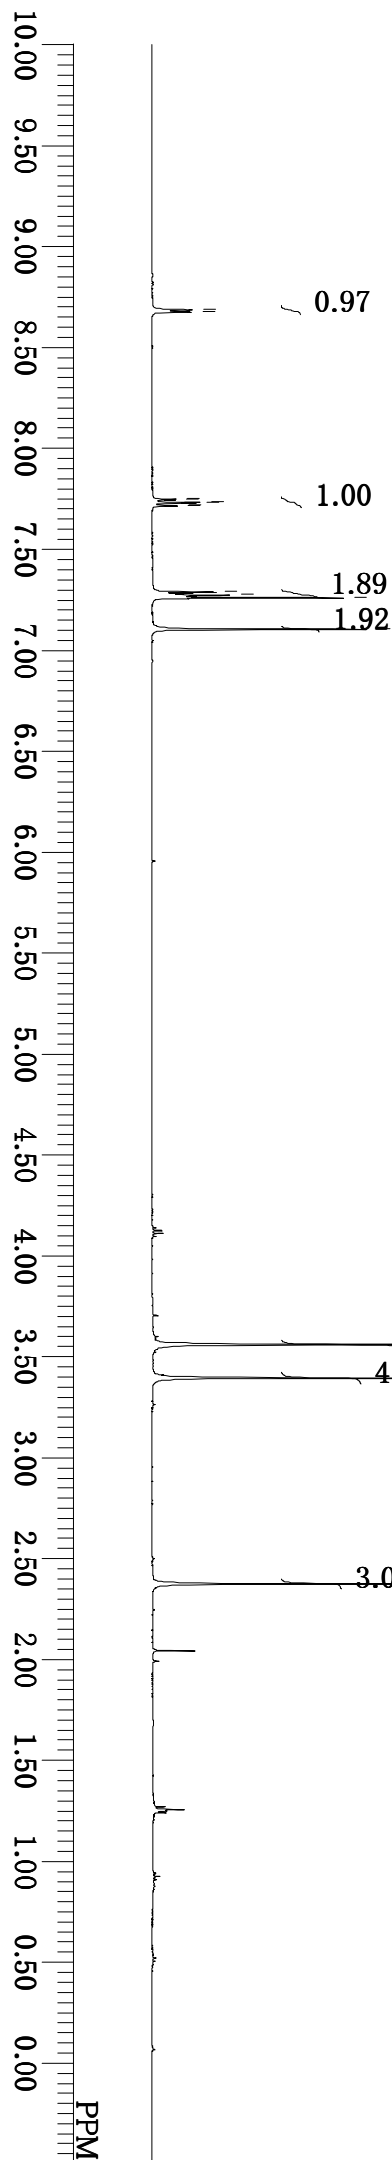

3.560  
3.395

2.375

125 MHz, CDCl<sub>3</sub>

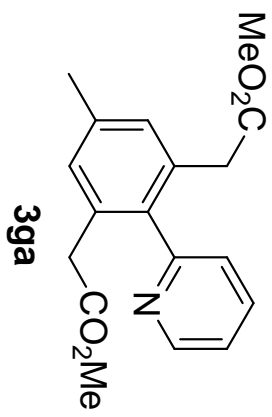

|         |  |
|---------|--|
| 171.925 |  |
| 157.856 |  |
| 149.548 |  |
| 138.169 |  |
| 138.026 |  |
| 136.052 |  |
| 132.504 |  |
| 130.157 |  |
| 125.541 |  |
| 122.154 |  |
| 77.000  |  |
| 51.828  |  |
| 39.009  |  |
| 21.105  |  |

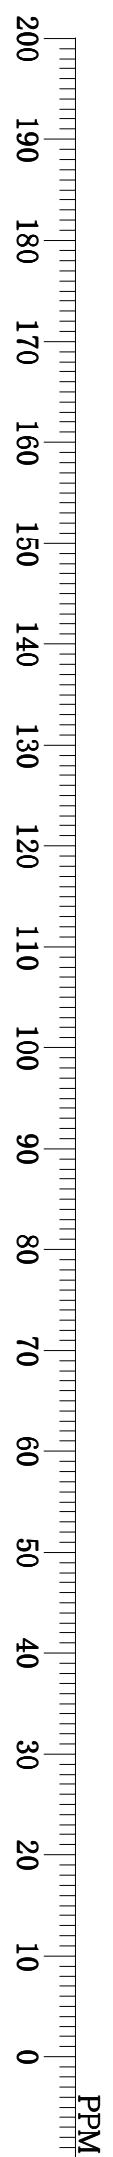

500 MHz, CDCl<sub>3</sub>

8.697  
8.694  
8.686  
8.682  
7.746  
7.741  
7.730  
7.726  
7.715  
7.711  
7.260  
7.257  
7.253  
7.250  
7.247  
7.245  
7.243  
7.237  
7.235  
7.233  
7.020  
6.995

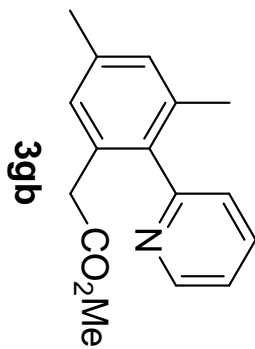

10.00  
9.50  
9.00  
8.50  
8.00  
7.50  
7.00  
6.50  
6.00  
5.50  
5.00  
4.50  
4.00  
3.50  
3.00  
2.50  
2.00  
1.50  
1.00  
0.50  
0.00  
PPM

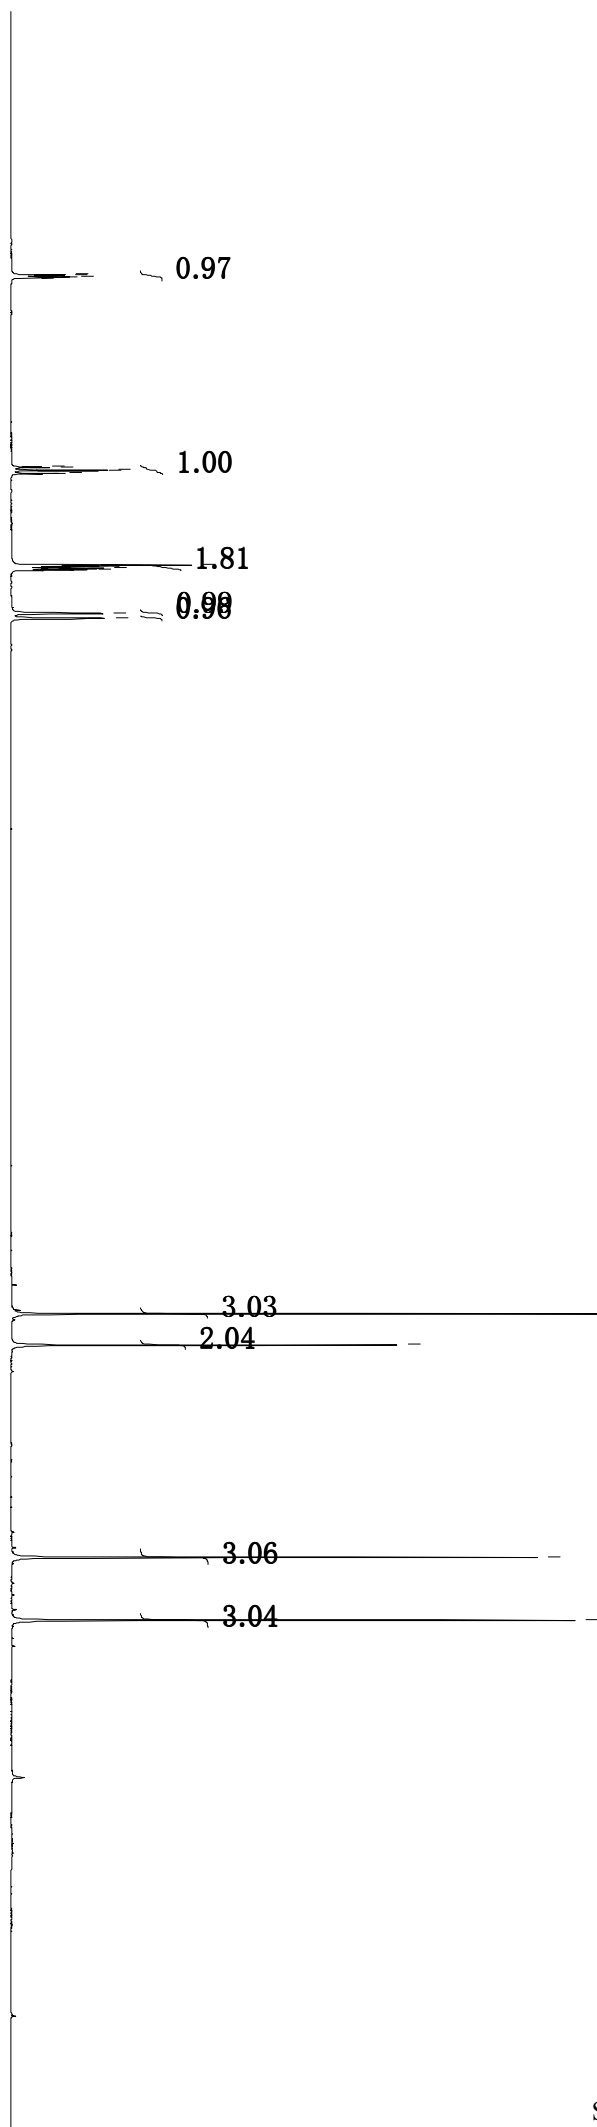

125 MHz, CDCl<sub>3</sub>

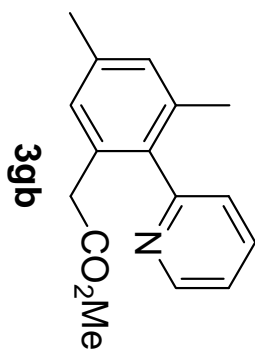

172.183

158.944

149.587

137.826

137.731

136.023

132.074

129.957

128.507

125.149

121.792

77.000

51.771

38.999

21.096

20.218

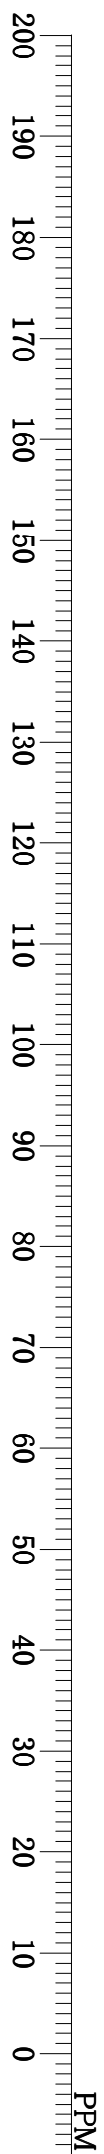

500 MHz, CDCl<sub>3</sub>

8.711  
8.708  
8.701  
8.696  
7.760  
7.757  
7.744  
7.741  
7.730  
7.726  
7.338  
7.323  
7.307  
7.287  
7.284  
7.281  
7.275  
7.273  
7.269  
7.265  
7.260  
7.251  
7.237  
7.195  
7.192  
7.180  
7.178

3.550  
3.397

2.391  
2.376  
2.361  
2.346

1.048  
1.034  
1.019

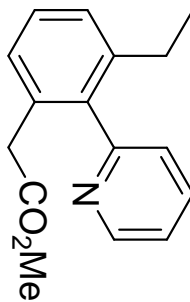

3h

0.96

1.00

1.00  
0.99

3.01

2.05

2.03

3.06

10.00  
9.50  
9.00  
8.50  
8.00  
7.50  
7.00  
6.50  
6.00  
5.50  
5.00  
4.50  
4.00  
3.50  
3.00  
2.50  
2.00  
1.50  
1.00  
0.50  
0.00  
PPM



125 MHz, CDCl<sub>3</sub>

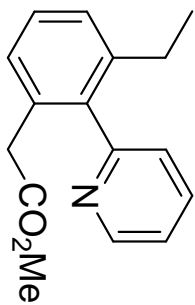

3h

|         |
|---------|
| 172.068 |
| 158.696 |
| 149.558 |
| 142.290 |
| 140.163 |
| 135.966 |
| 132.265 |
| 128.402 |
| 127.773 |
| 127.467 |
| 125.121 |
| 121.973 |
| 77.000  |
| 51.790  |
| 39.076  |
| 26.533  |
| 15.268  |

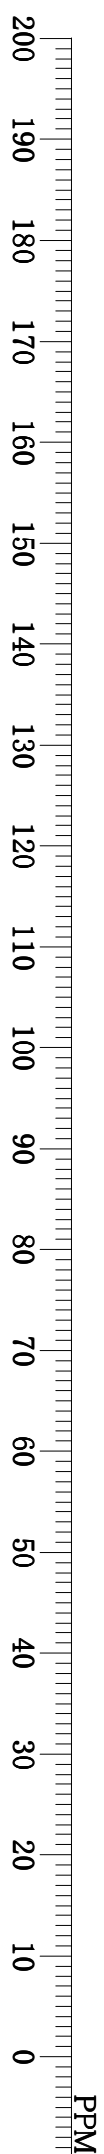

500 MHz, CDCl<sub>3</sub>

8.813  
8.809  
8.807  
8.804  
8.801  
8.798  
7.902  
7.885  
7.878  
7.862  
7.859  
7.855  
7.843  
7.839  
7.828  
7.825  
7.498  
7.481  
7.467  
7.465  
7.455  
7.451  
7.448  
7.439  
7.436  
7.434  
7.420  
7.392  
7.389  
7.385  
7.381  
7.379  
7.377  
7.375  
7.367  
7.364  
7.355  
7.352  
7.346  
7.342  
7.329  
7.325  
7.260  
3.619  
3.614  
3.605

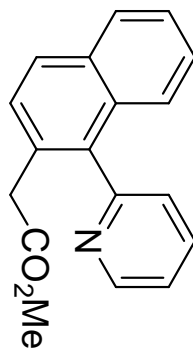

3i

10.00  
9.50  
9.00  
8.50  
8.00  
7.50  
7.00  
6.50  
6.00  
5.50  
5.00  
4.50  
4.00  
3.50  
3.00  
2.50  
2.00  
1.50  
1.00  
0.50  
0.00  
PPM

0.94

4.94

1.008

2.96

1.7815

125 MHz, CDCl<sub>3</sub>

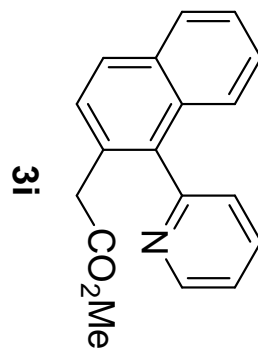

|         |
|---------|
| 171.944 |
| 157.895 |
| 149.873 |
| 137.769 |
| 136.195 |
| 132.704 |
| 132.360 |
| 129.814 |
| 128.621 |
| 127.935 |
| 127.916 |
| 126.370 |
| 126.046 |
| 125.817 |
| 125.645 |
| 122.345 |

|        |
|--------|
| 77.000 |
| 51.943 |
| 39.142 |

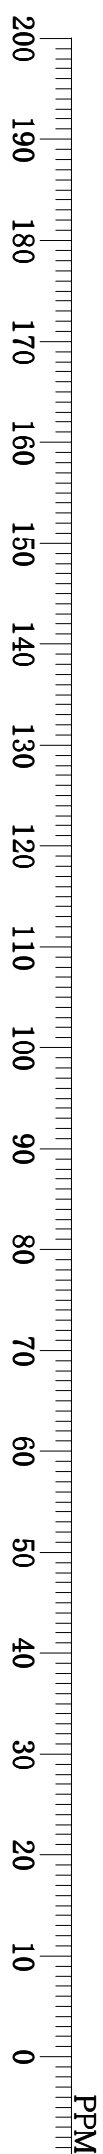

500 MHz, CDCl<sub>3</sub>

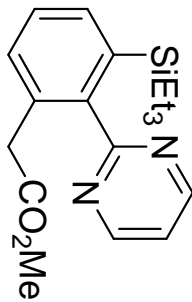

3j

8.822  
8.812  
7.565  
7.561  
7.550  
7.547  
7.409  
7.394  
7.379  
7.370  
7.367  
7.354  
7.352  
7.300  
7.290  
7.281  
7.260

3.558  
3.511

0.823  
0.807  
0.791  
0.428  
0.412  
0.397  
0.381

10.00  
9.50  
9.00  
8.50  
8.00  
7.50  
7.00  
6.50  
6.00  
5.50  
5.00  
4.50  
4.00  
3.50  
3.00  
2.50  
2.00  
1.50  
1.00  
0.50  
0.00  
PPM

1.96

1.00  
1.04  
1.02

2.09 3.11

9.08

6.09

125 MHz, CDCl<sub>3</sub>

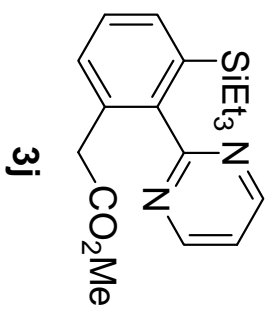

|         |  |
|---------|--|
| 171.801 |  |
| 168.682 |  |
| 156.588 |  |
| 145.399 |  |
| 136.338 |  |
| 134.812 |  |
| 131.845 |  |
| 131.388 |  |
| 127.839 |  |
| 119.388 |  |
| 77.000  |  |
| 51.819  |  |
| 39.400  |  |
| 7.532   |  |
| 3.822   |  |

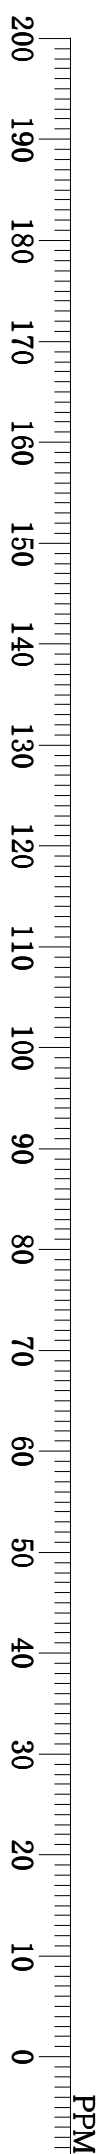

500 MHz, CDCl<sub>3</sub>

8.845  
8.835

7.452  
7.438  
7.322  
7.307  
7.301  
7.299  
7.292  
7.268  
7.260  
7.254

2.073

0.830  
0.814  
0.798  
0.400  
0.384  
0.369  
0.353

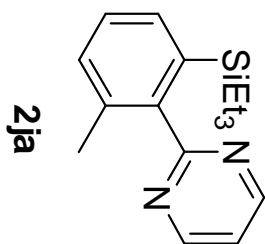

1.93

1.00  
2.068

2.92

9.03

6.01

10.00 9.50 9.00 8.50 8.00 7.50 7.00 6.50 6.00 5.50 5.00 4.50 4.00 3.50 3.00 2.50 2.00 1.50 1.00 0.50 0.00

PPM

125 MHz, CDCl<sub>3</sub>

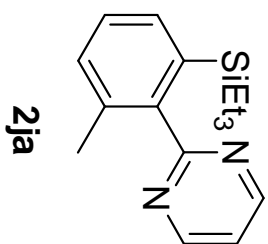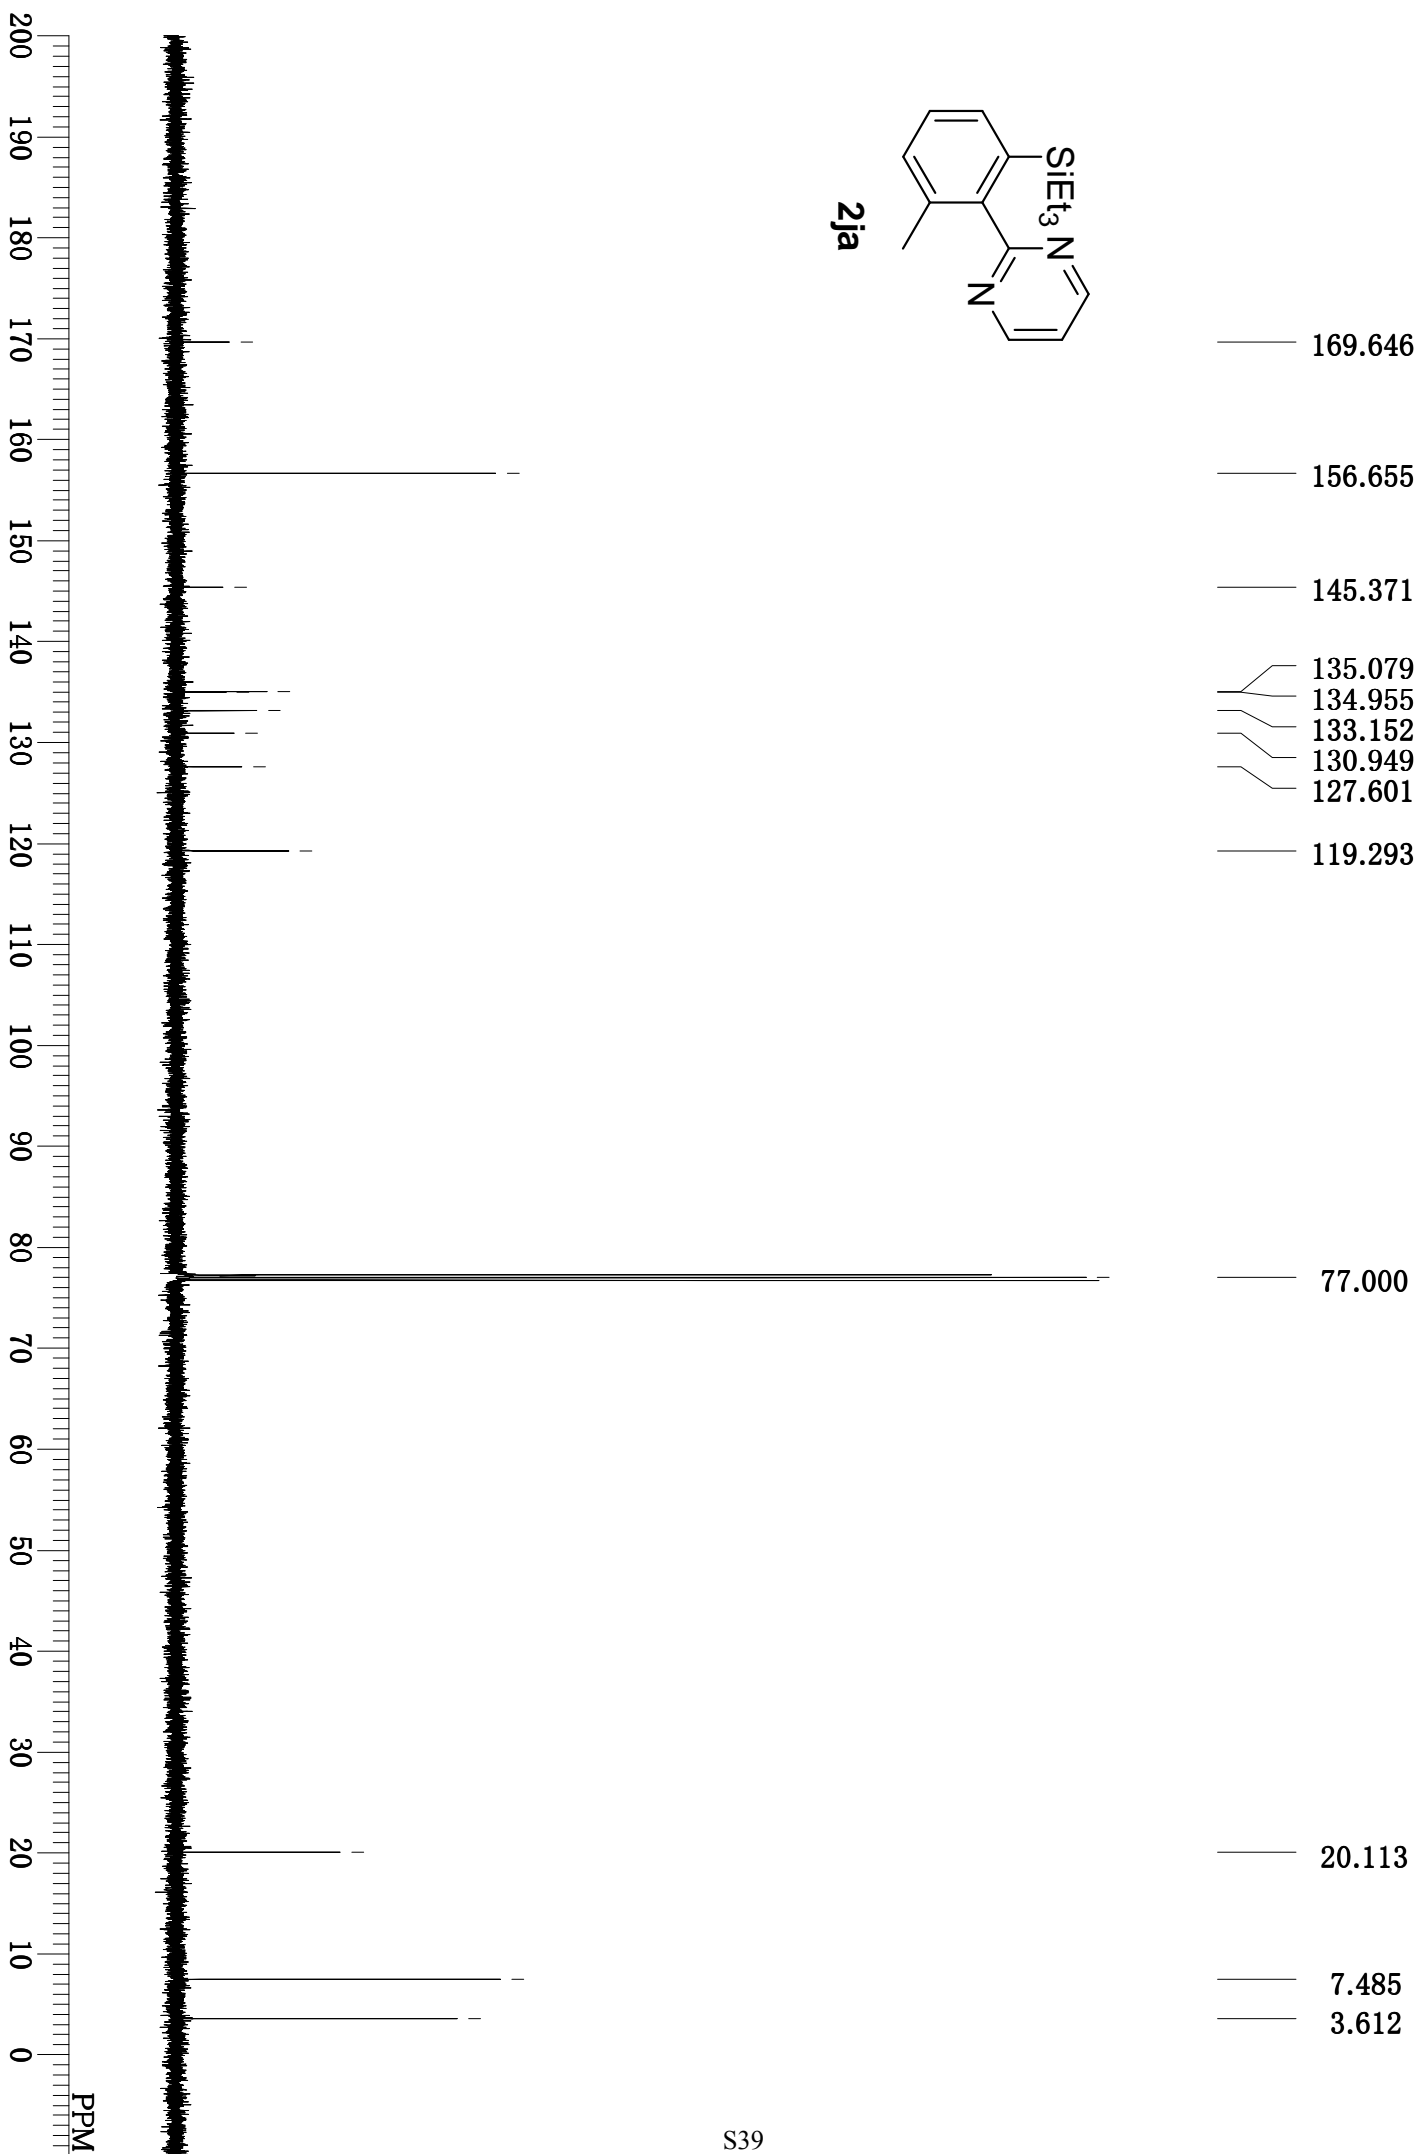

500 MHz, CDCl<sub>3</sub>

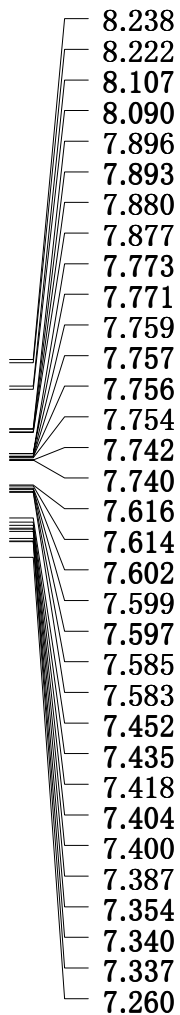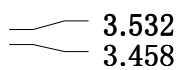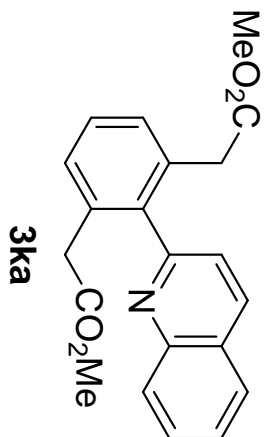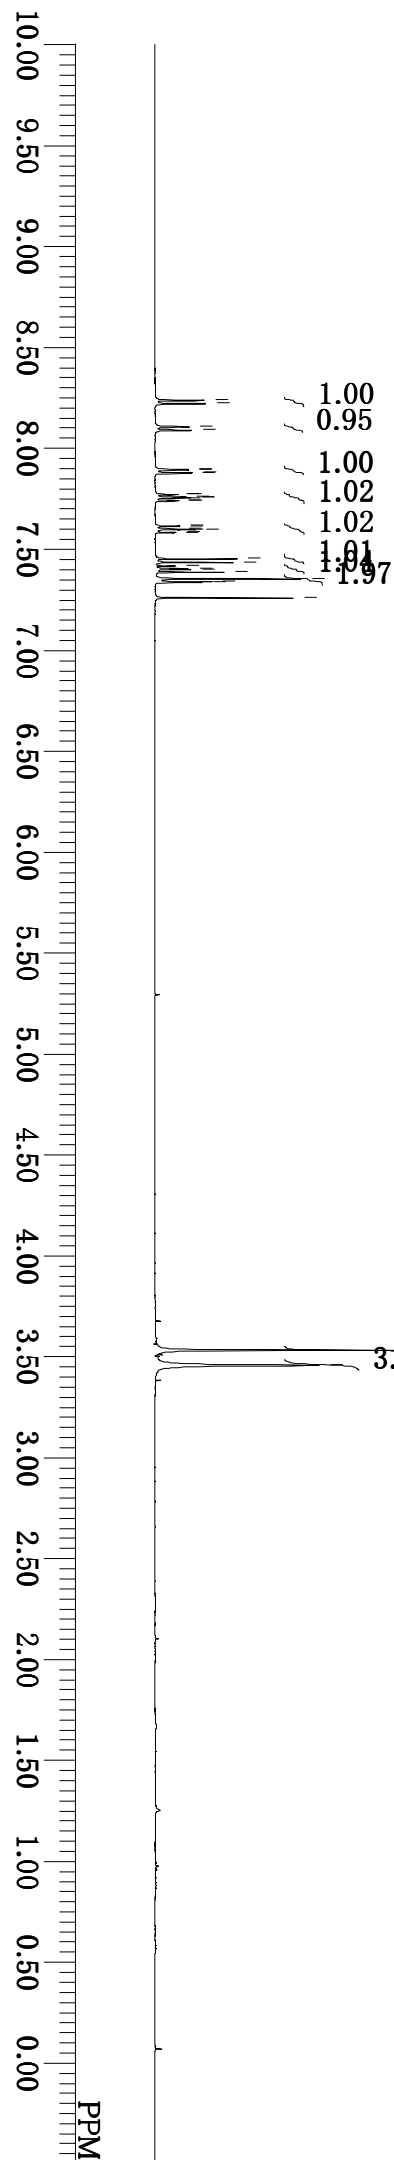



125 MHz, CDCl<sub>3</sub>

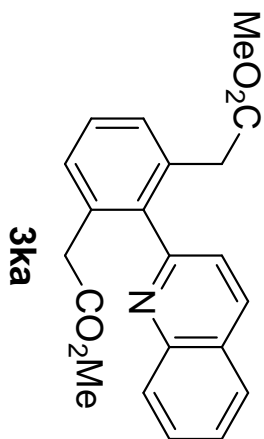

171.735  
158.391  
147.870  
141.078  
136.195  
132.752  
129.823  
129.623  
129.470  
128.679  
127.649  
126.847  
123.127

77.248  
77.000  
76.742

51.838

39.057

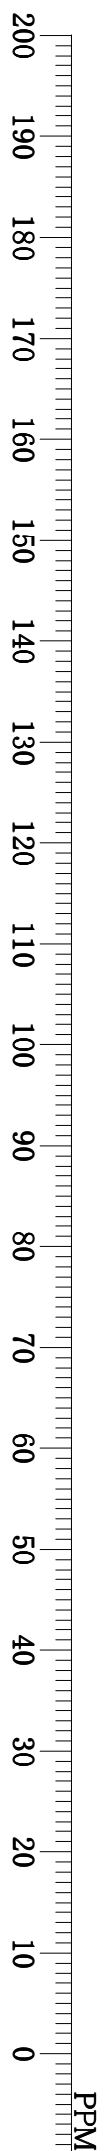

500 MHz, CDCl<sub>3</sub>

8.236  
8.220  
8.137  
8.121  
7.892  
7.875  
7.768  
7.765  
7.755  
7.751  
7.749  
7.738  
7.735  
7.607  
7.605  
7.593  
7.591  
7.589  
7.577  
7.575  
7.419  
7.402  
7.329  
7.314  
7.299  
7.260  
7.250  
7.244  
7.235  
7.229

3.512  
3.467

2.106

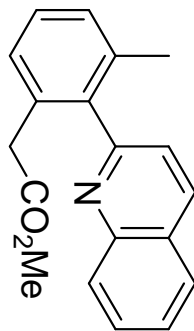

3kb

1.00  
0.96  
1.00  
1.00  
1.01  
1.00  
1.04  
1.97

3.09  
1.99

2.98

10.00 9.50 9.00 8.50 8.00 7.50 7.00 6.50 6.00 5.50 5.00 4.50 4.00 3.50 3.00 2.50 2.00 1.50 1.00 0.50 0.00 PPM

125 MHz, CDCl<sub>3</sub>

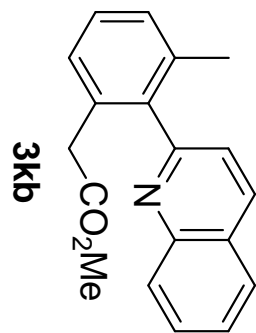

|         |
|---------|
| 171.954 |
| 159.430 |
| 147.984 |
| 140.792 |
| 136.204 |
| 136.157 |
| 132.313 |
| 129.652 |
| 129.499 |
| 129.318 |
| 128.364 |
| 128.068 |
| 127.601 |
| 126.771 |
| 126.618 |
| 122.984 |

|        |
|--------|
| 77.000 |
| 51.752 |
| 39.009 |
| 20.390 |



500 MHz, CDCl<sub>3</sub>

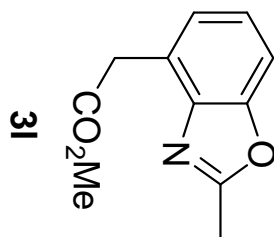

7.391  
7.375  
7.260  
7.245  
7.229  
7.204  
7.189

1.00  
0.98

2.10

3.11

3.13

4.001

3.706

2.635

10.00 9.50 9.00 8.50 8.00 7.50 7.00 6.50 6.00 5.50 5.00 4.50 4.00 3.50 3.00 2.50 2.00 1.50 1.00 0.50 0.00

PPM

125 MHz, CDCl<sub>3</sub>

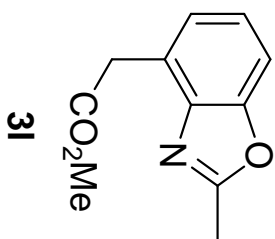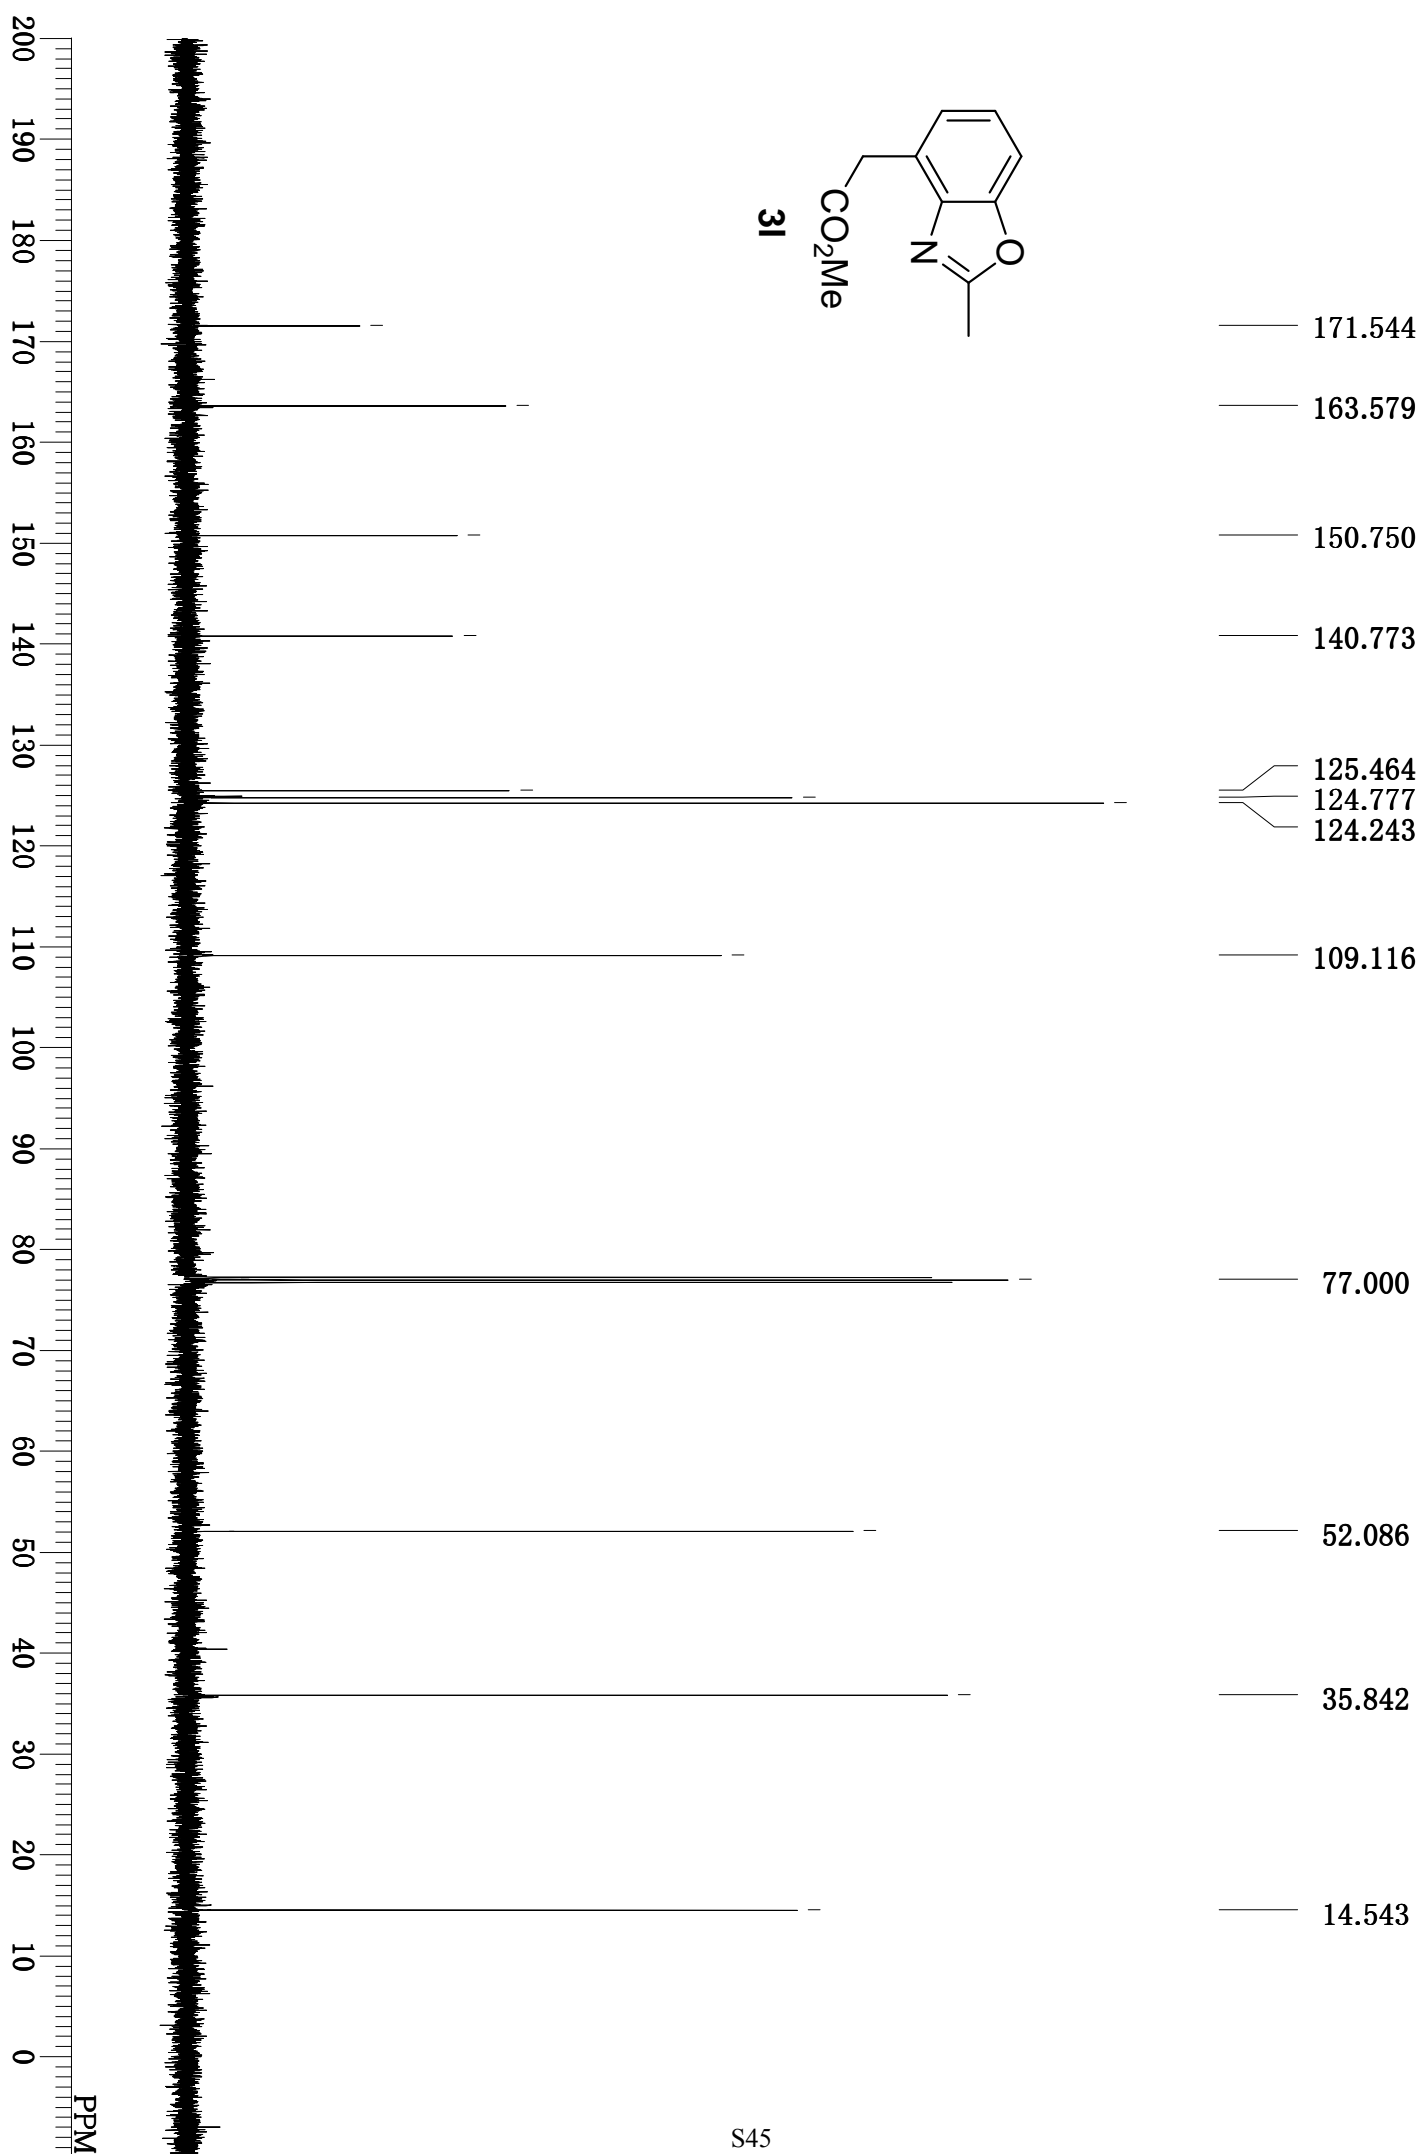

500 MHz, CDCl<sub>3</sub>

8.712  
8.703  
7.877  
7.861  
7.791  
7.776  
7.762  
7.340  
7.325  
7.304  
7.296  
7.279  
7.260  
7.085  
7.069  
7.054

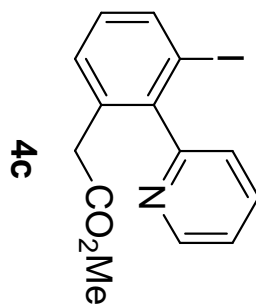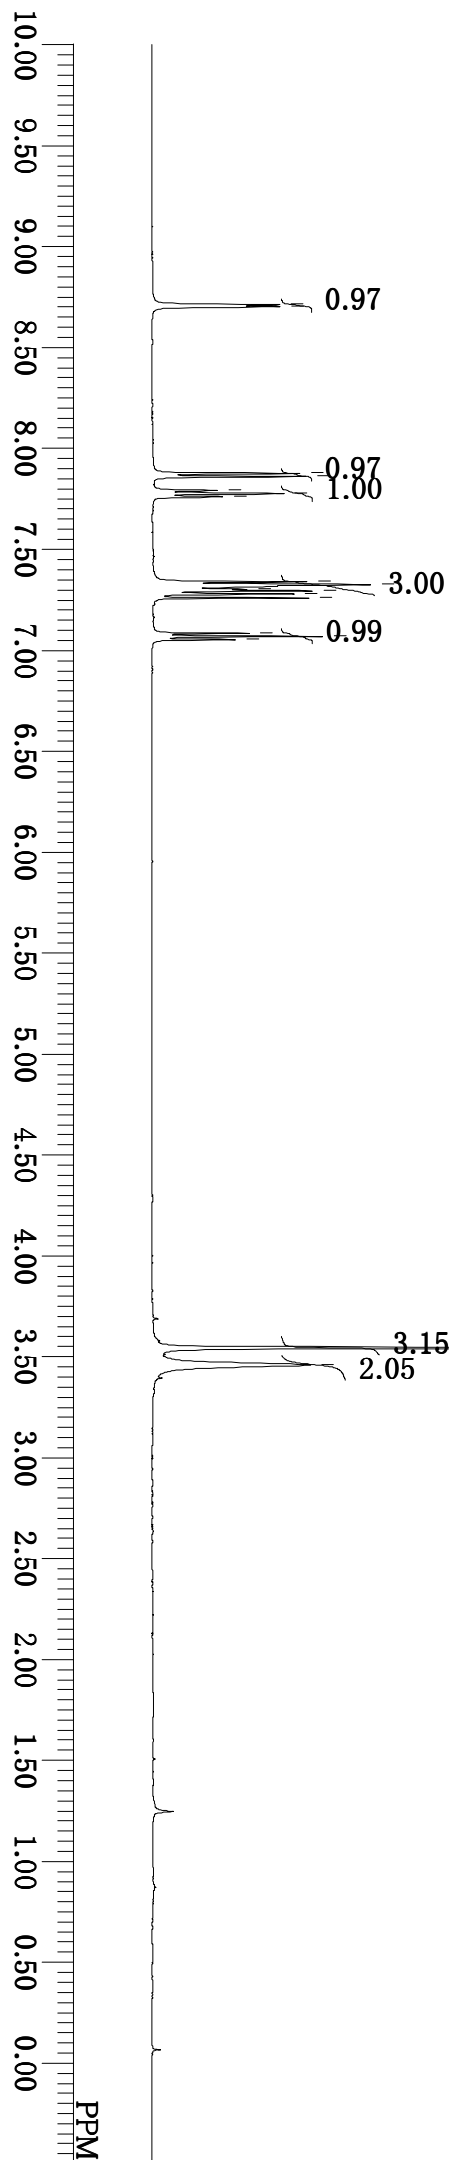

3.545  
3.459

125 MHz, CDCl<sub>3</sub>

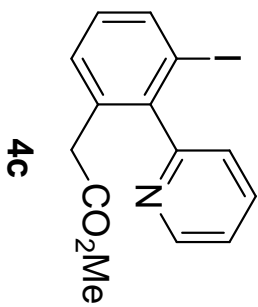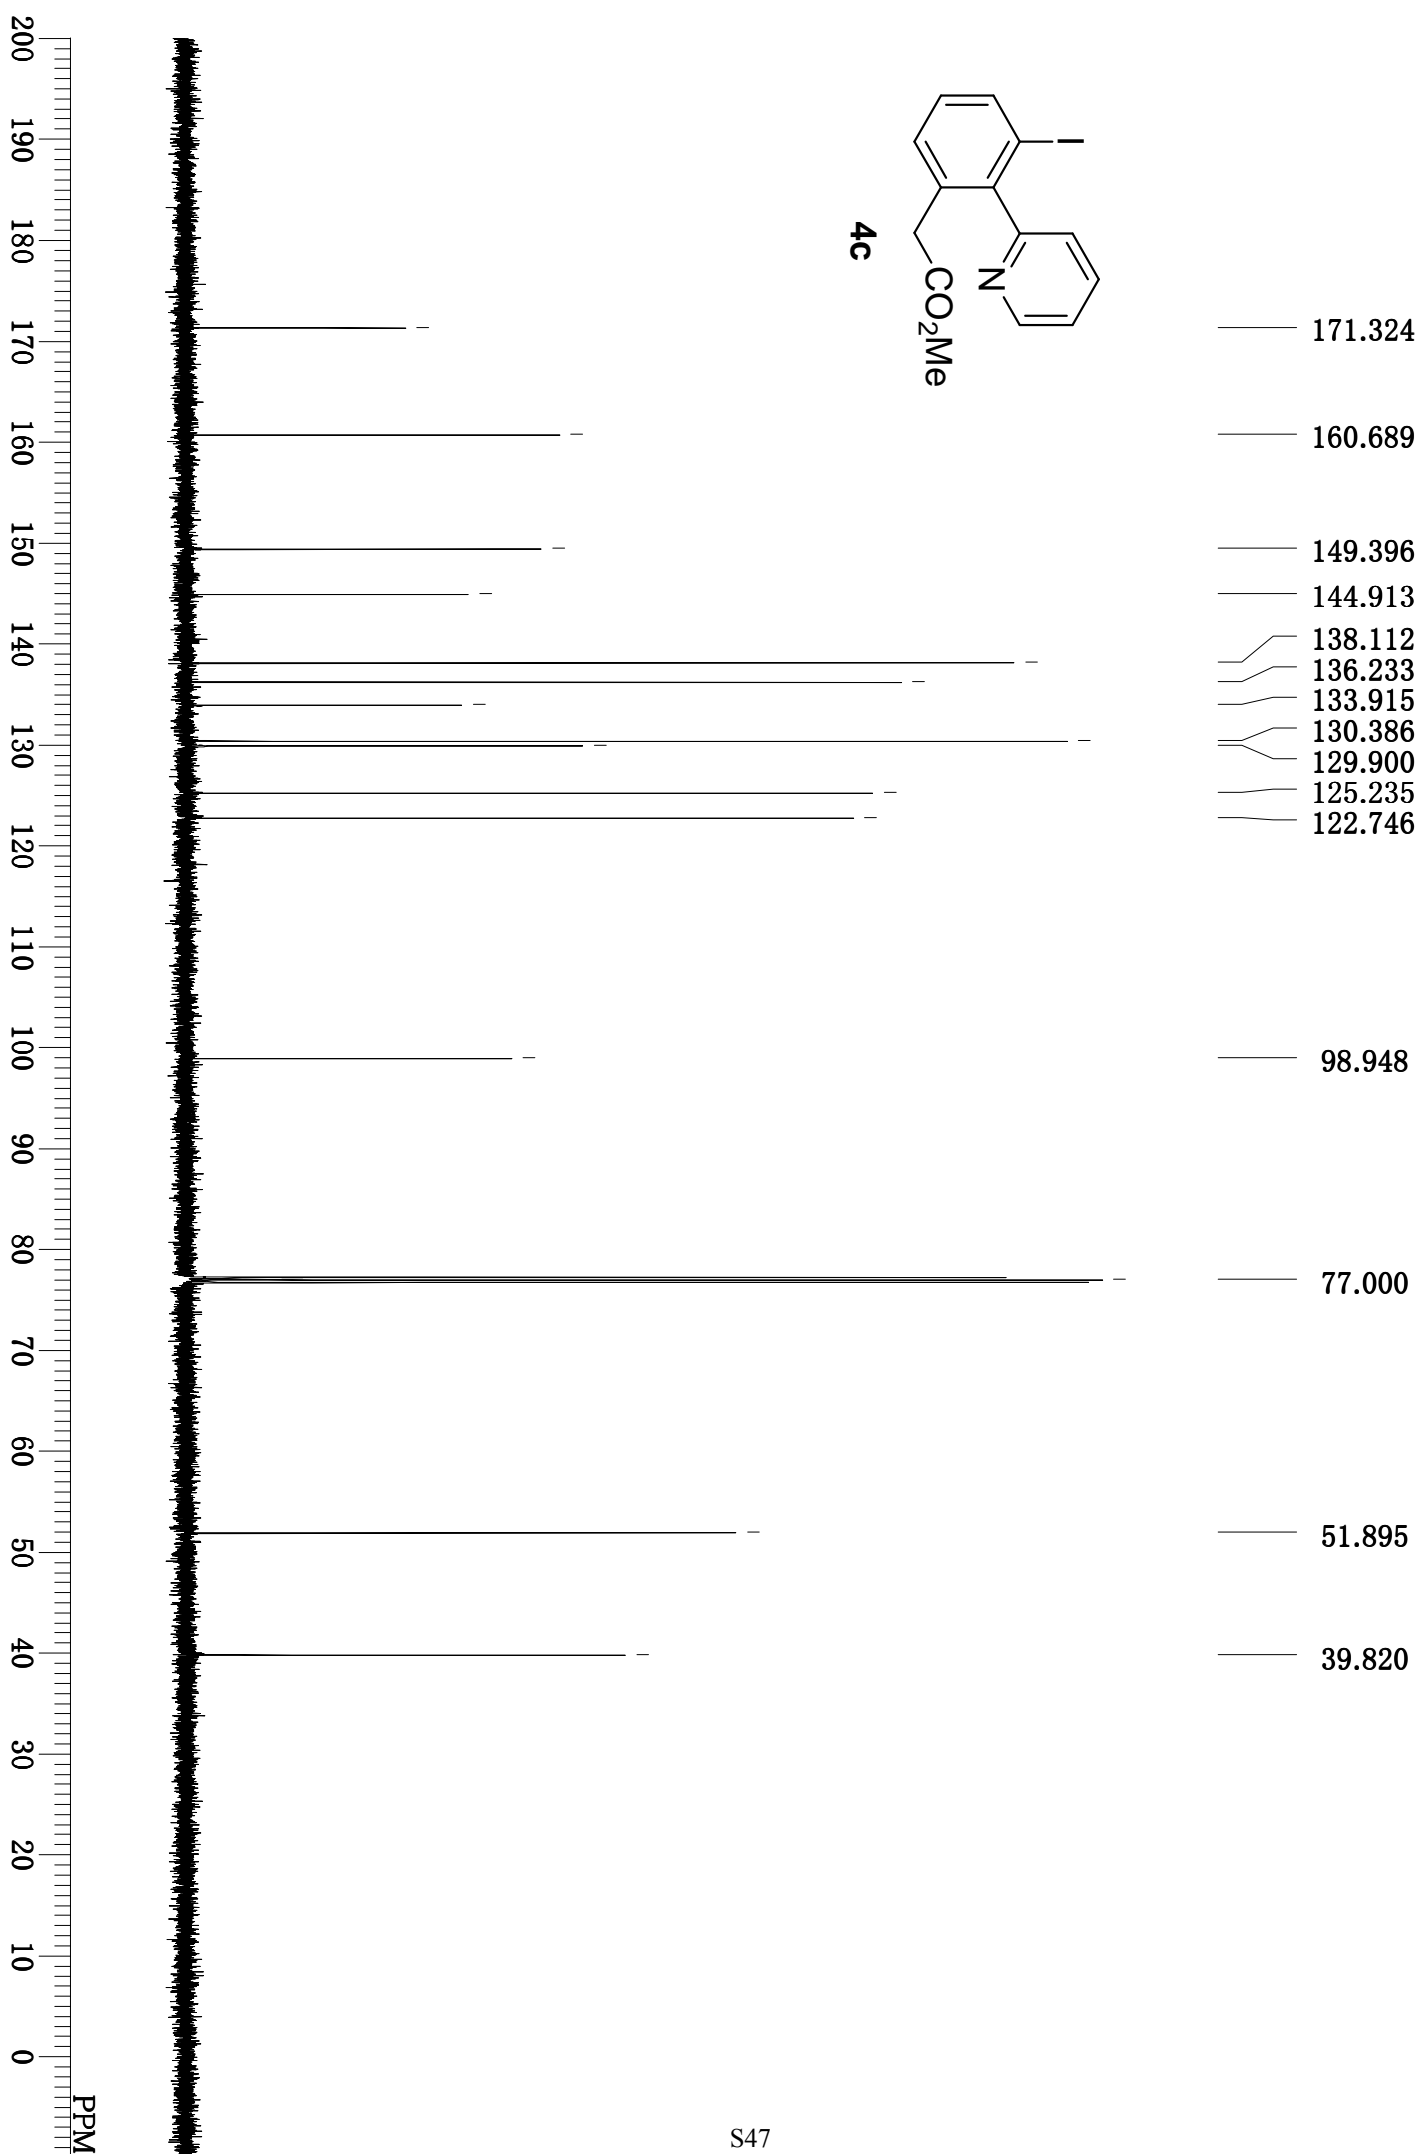

500 MHz, CDCl<sub>3</sub>

8.631  
8.629  
8.626  
8.620  
8.618  
8.615  
7.459  
7.443  
7.428  
7.421  
7.417  
7.405  
7.402  
7.391  
7.385  
7.379  
7.376  
7.372  
7.369  
7.364  
7.361  
7.260  
7.150  
7.142  
7.139  
7.132  
7.128  
7.123  
7.119  
7.107  
7.104  
7.097  
7.095  
7.092  
7.089  
7.082  
7.080  
7.076  
7.071  
7.064  
7.056  
7.052  
6.859  
6.857  
6.855  
6.843  
6.841  
6.839  
3.656  
3.526

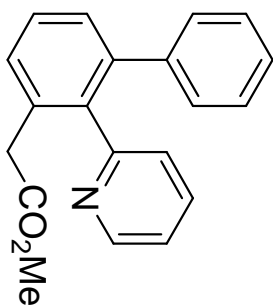

5c

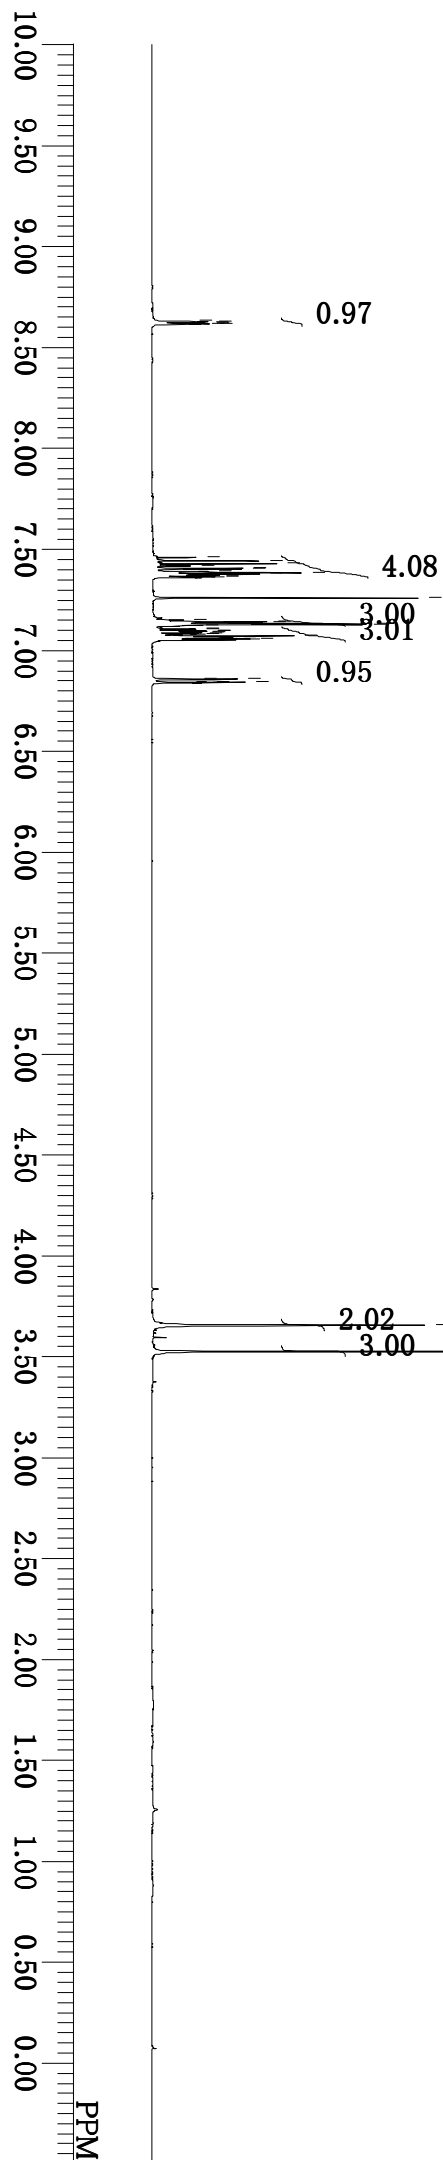



125 MHz, CDCl<sub>3</sub>

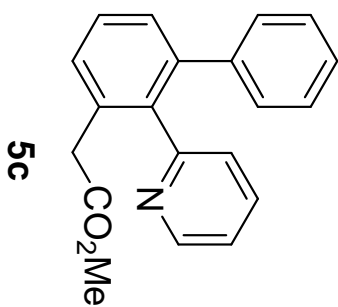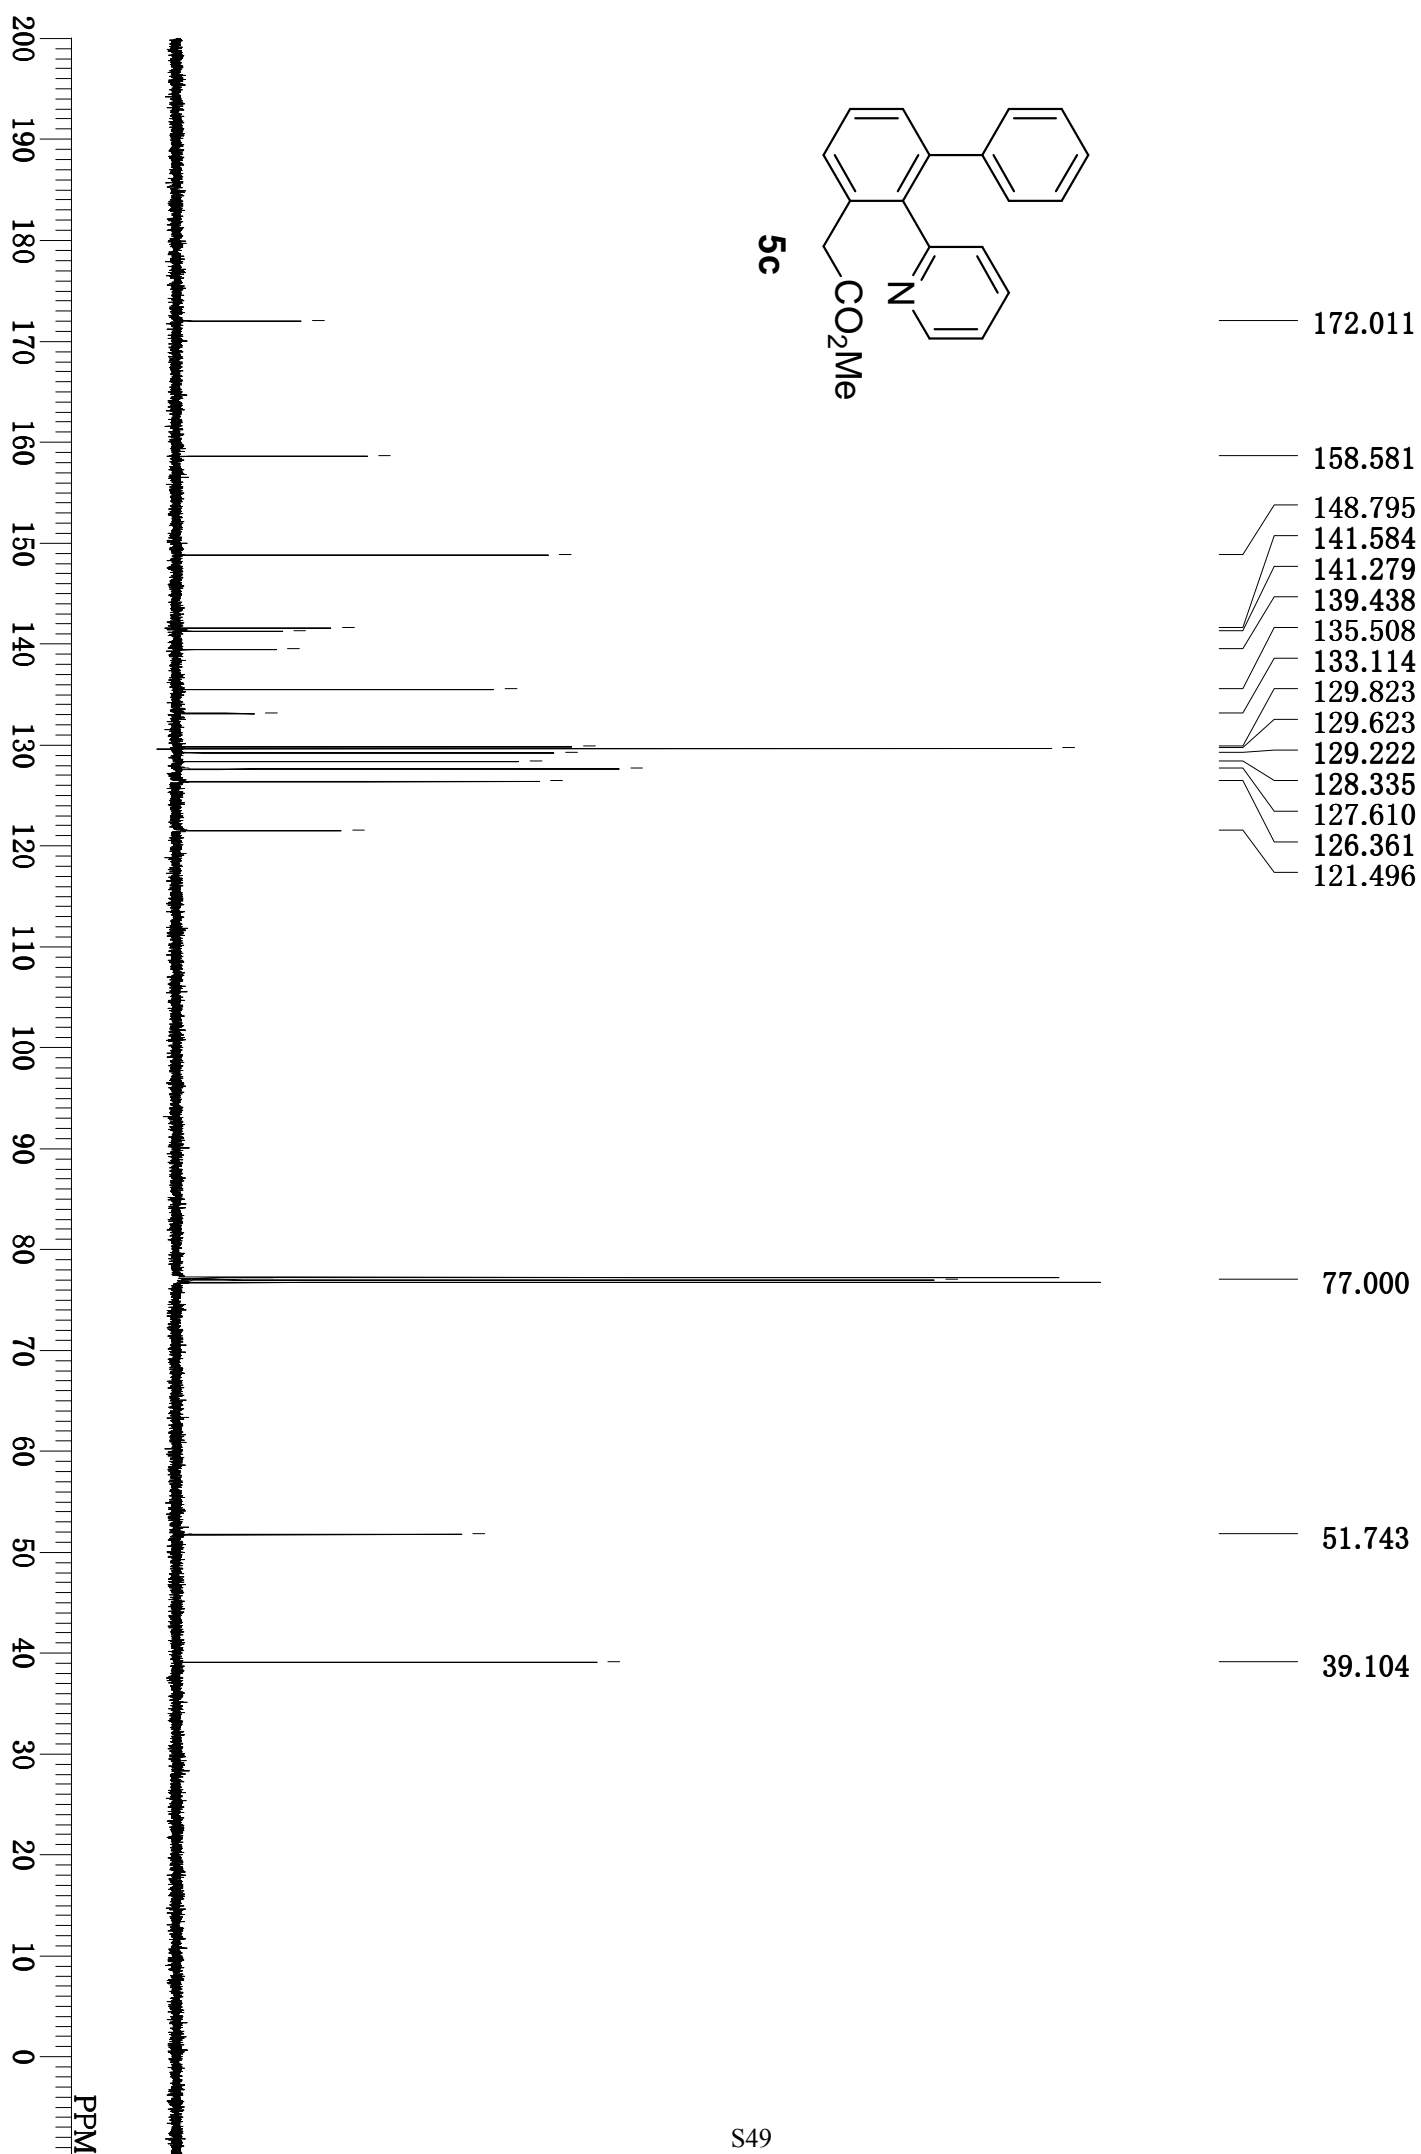

Supplement: Supplementary file 1 [file 4150480]
